# Supplementary material for: Synthesis of N-Methylmorpholinium Derivatives Possessing a 1,3,4-Oxadiazole Core as Feasible Antibacterial Agents against Plant Bacterial Diseases
Source: Hindawi journal article supplement (doi:10.1155/2021/5415950), 2021-09-01
Supplement: f1 [file 5415950.f1.docx]

**Synthesis of *N*-Methylmorpholinium Derivatives Possessing a 1,3,4-Oxadiazole Core as Feasible Antibacterial Agents against Plant Bacterial Diseases**

Xinxin Tuo 1, Jie Yang 1, Yedong Zhang 1, Peiyi Wang* 1,

1 State Key Laboratory Breeding Base of Green Pesticide and Agricultural Bioengineering, Key Laboratory of Green Pesticide and Agricultural Bioengineering, Ministry of Education, Center for R&D of Fine Chemicals of Guizhou University, Guiyang, 550025, China.

Correspondence should be addressed to Peiyi Wang (pywang888@126.com).

**Content**

[1. 1H NMR, 13C NMR, and HRMS spectra of compounds **3a-3o** (Figures S1-S45)](#_Toc6068) 2

2. ANOVA and Post Hoc analysis of EC50 against *Xoo* 24

3. ANOVA and Post Hoc analysis of EC50 against *Xac* 26

4. ANOVA and Post Hoc analysis of inhibition rates against *F. oxysporum* 28

5. ANOVA and Post Hoc analysis of inhibition rates against *P. cinnamomi* 30

**1**. 1H NMR, 13C NMR, and HRMS spectra of compounds **3a-3o** (Figures S1-S45)


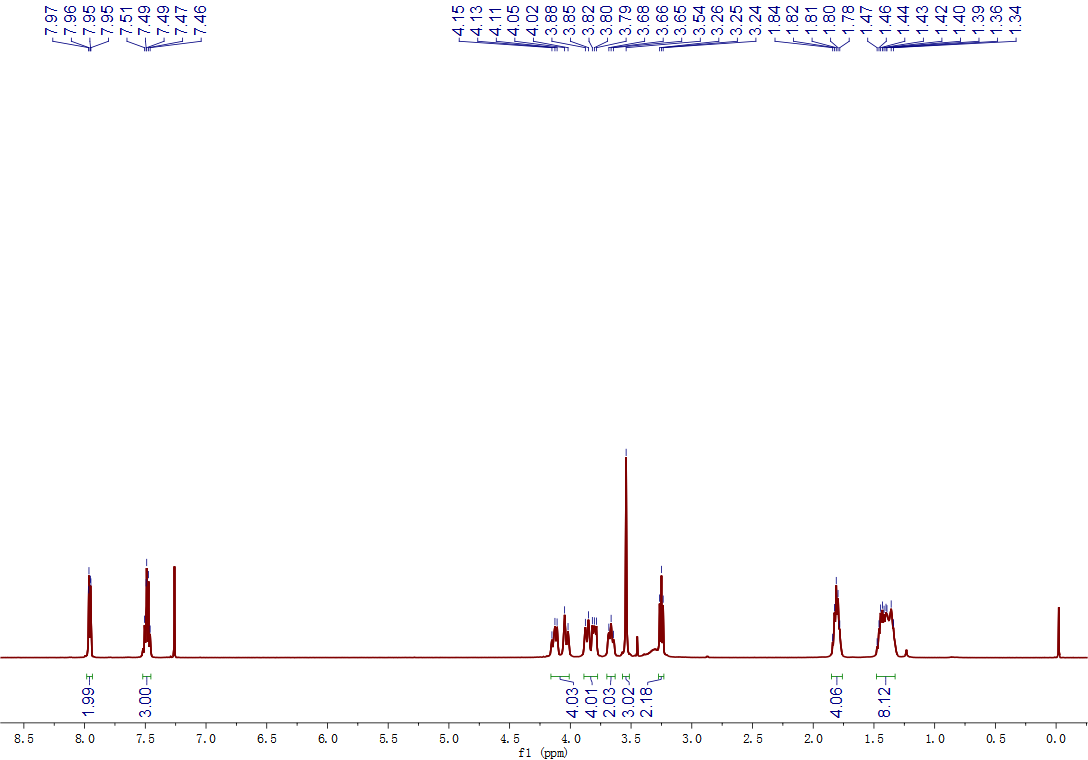
**Figure S1.** 1H NMR spectrum (CD3OD, 500 MHz) of **3a.**

**
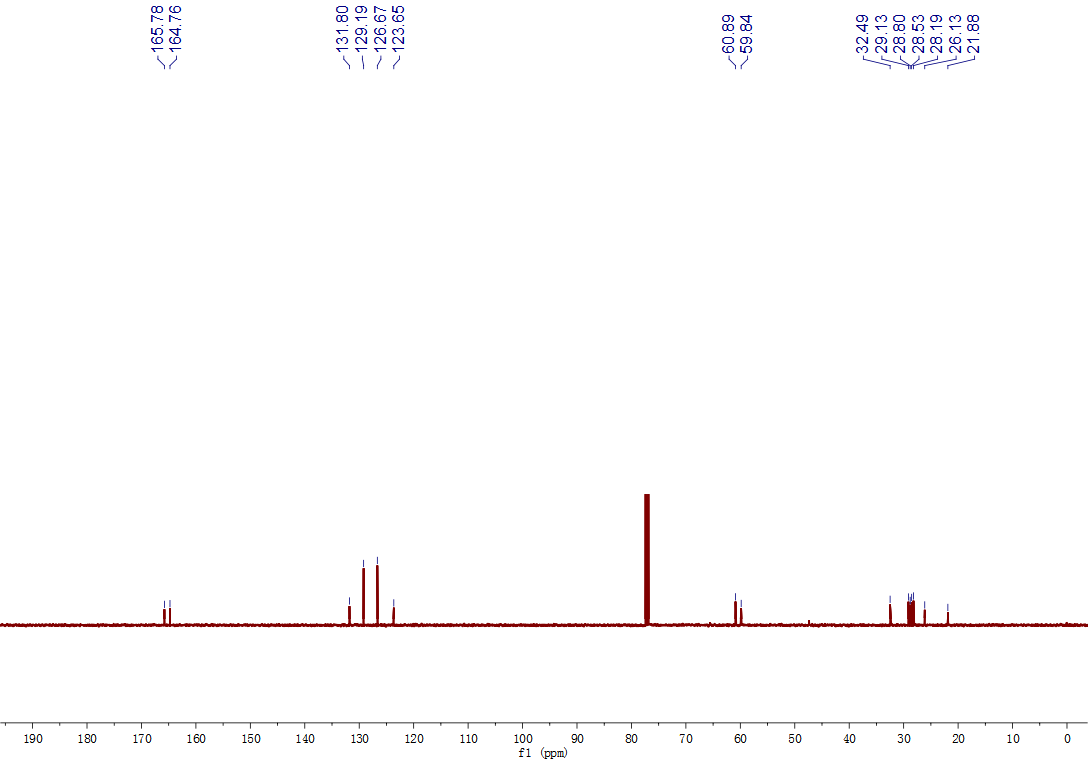
**

**Figure S2.** 13C NMR spectrum (CD3OD, 126 MHz) of **3a.**


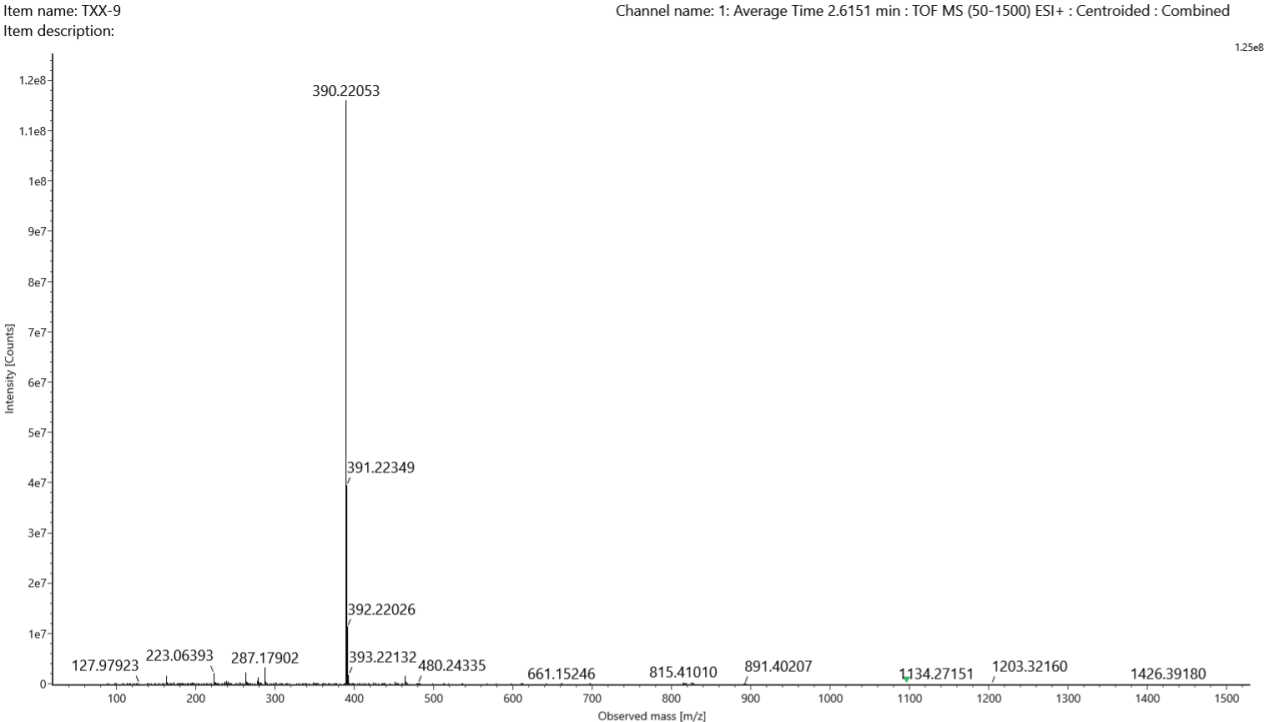


**Figure S3.** HRMS (ESI) for compound **3a.**

**
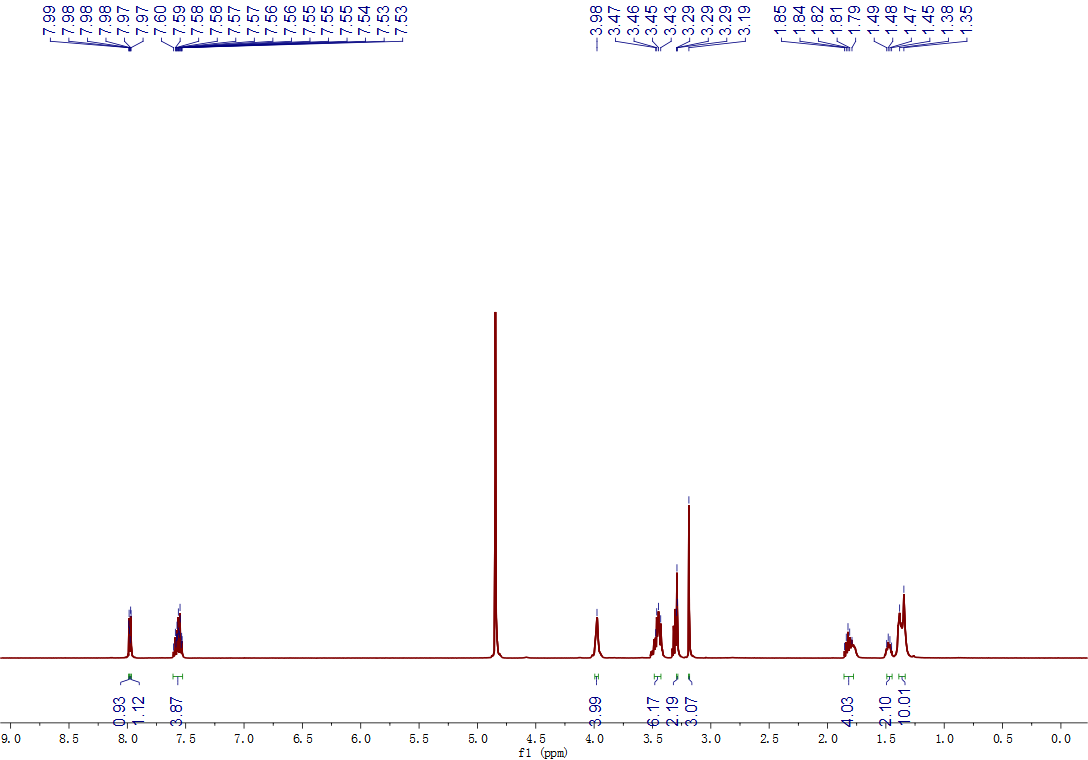
**

**Figure S4.** 1H NMR spectrum (CD3OD, 500 MHz) of **3b.**

**
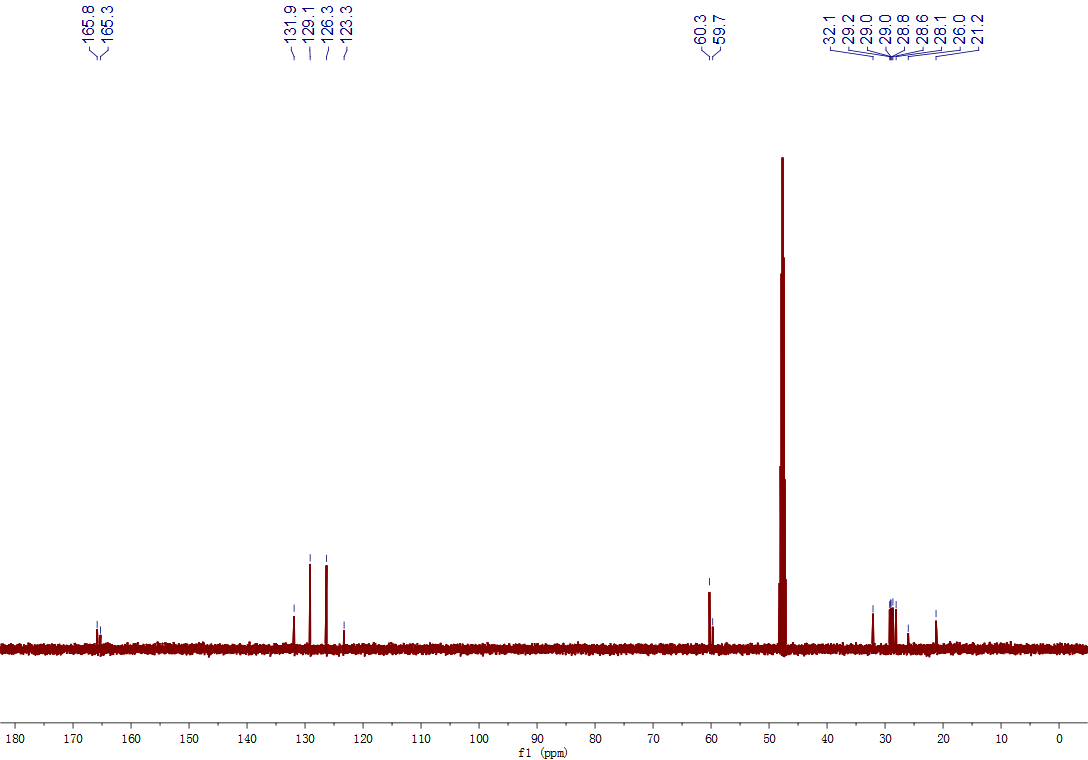
**

**Figure S5.** 13C NMR spectrum (CD3OD, 126 MHz) of **3b.**


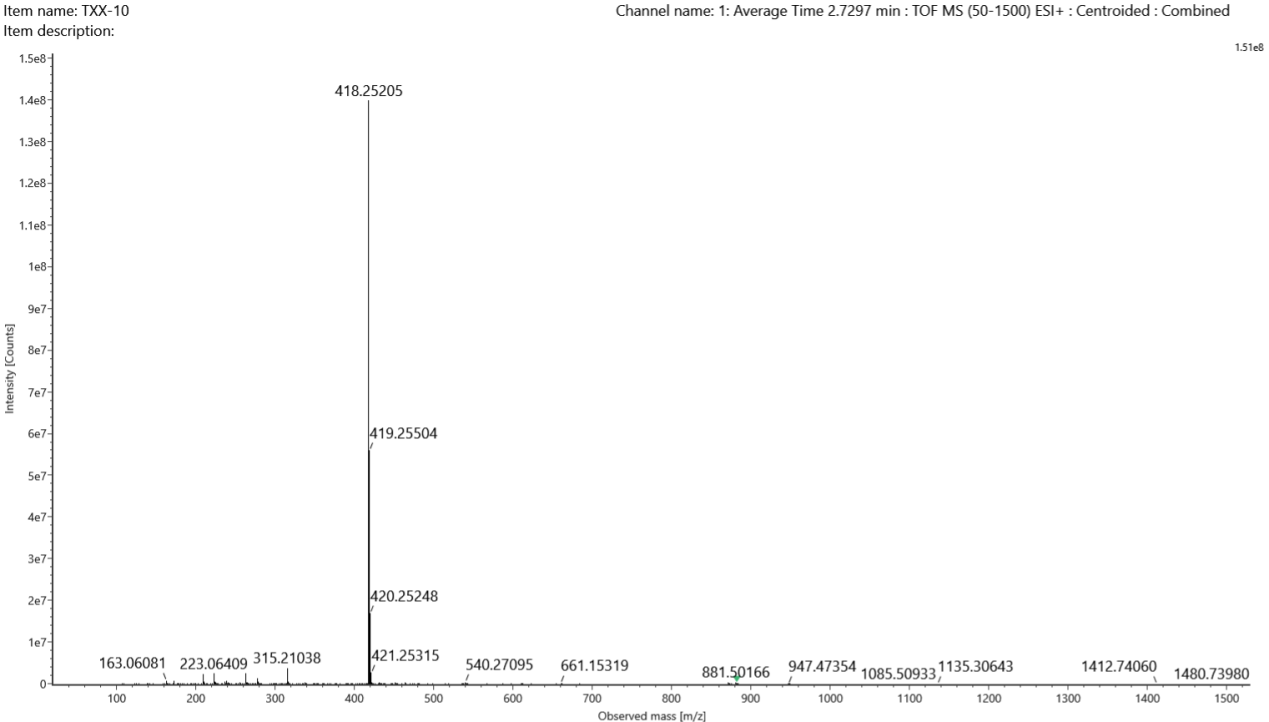


**Figure S6.** HRMS (ESI) for compound **3b.**

**
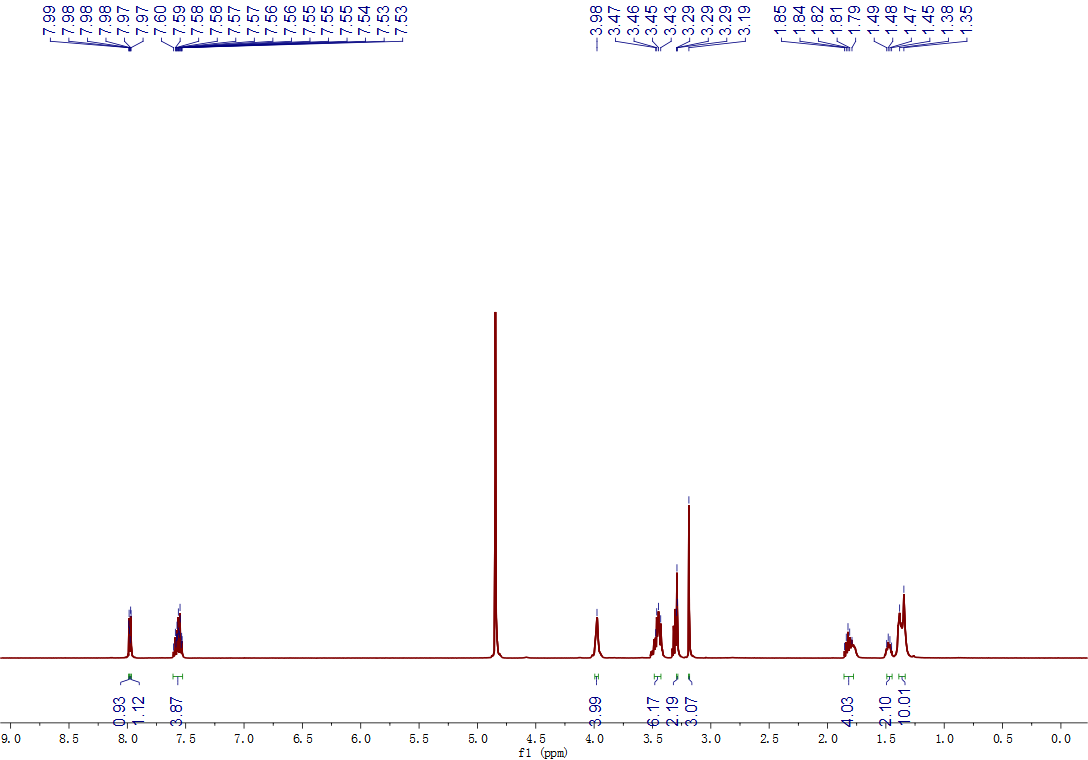
**

**Figure S7.** 1H NMR spectrum (CD3OD, 500 MHz) of **3c.**

**
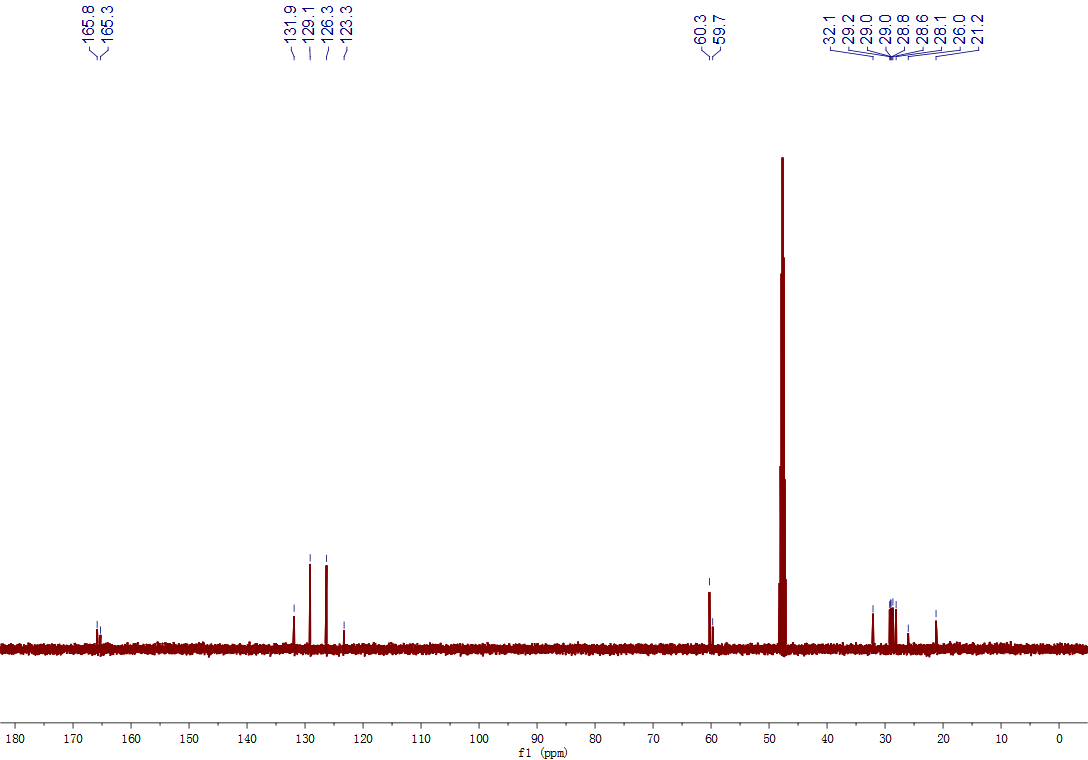
**

**Figure S8.** 13C NMR spectrum (CD3OD, 126 MHz) of **3c.**


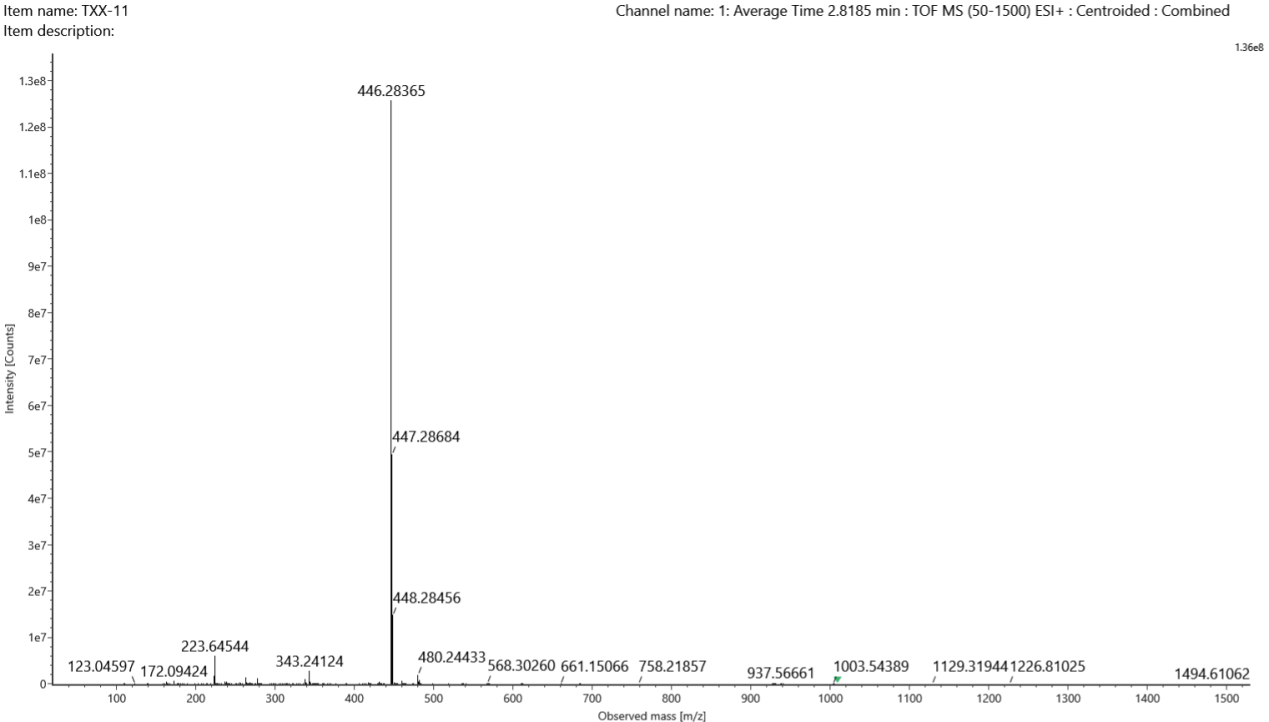


**Figure S9.** HRMS (ESI) for compound **3c.**

**
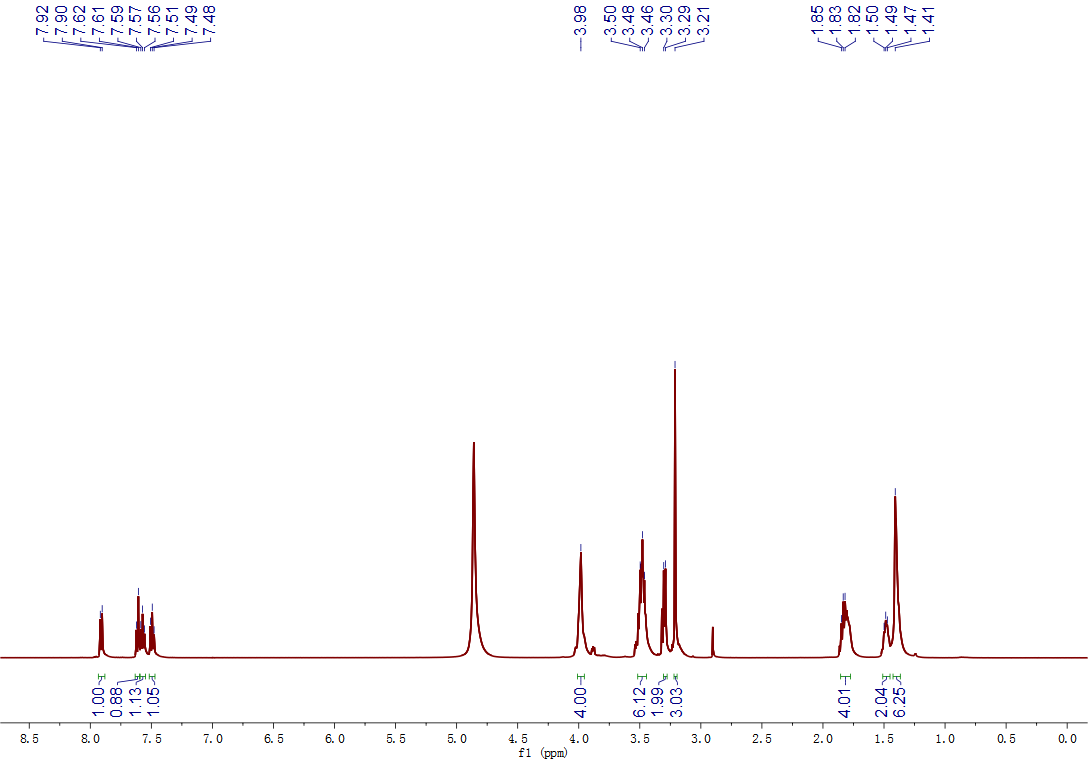
**

**Figure S10.**1H NMR spectrum (CD3OD, 500 MHz) of **3d.**

**
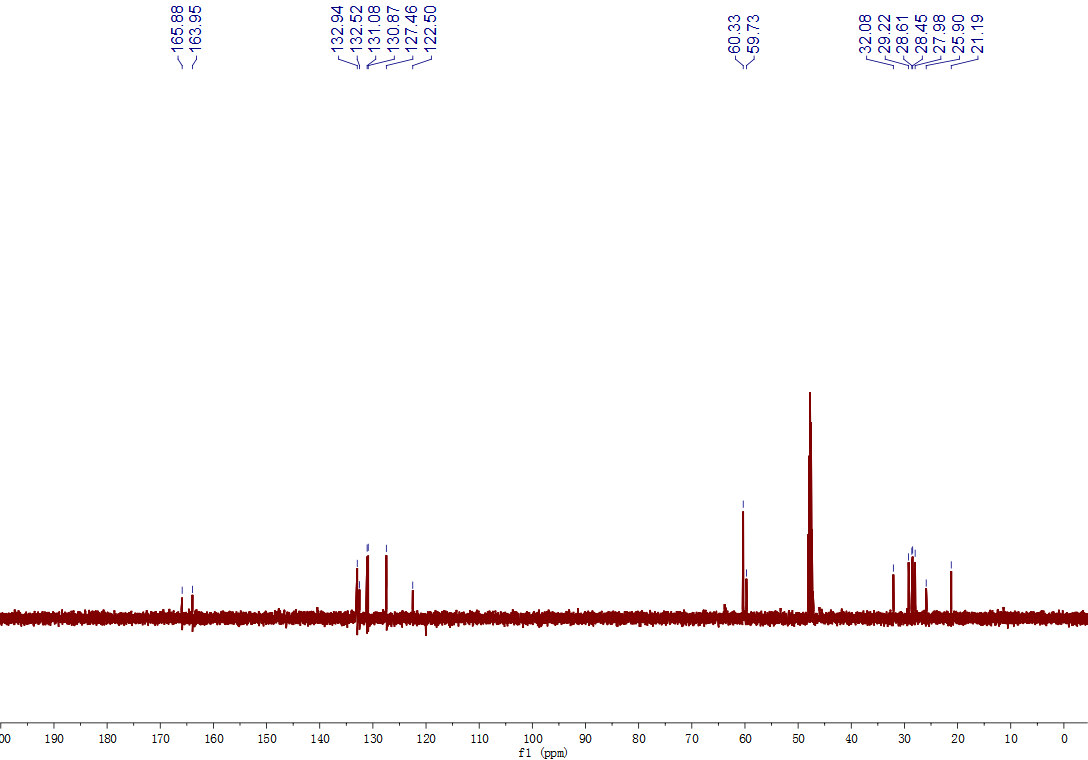
**

**Figure S11.** 13C NMR spectrum (CD3OD, 126 MHz) of **3d.**


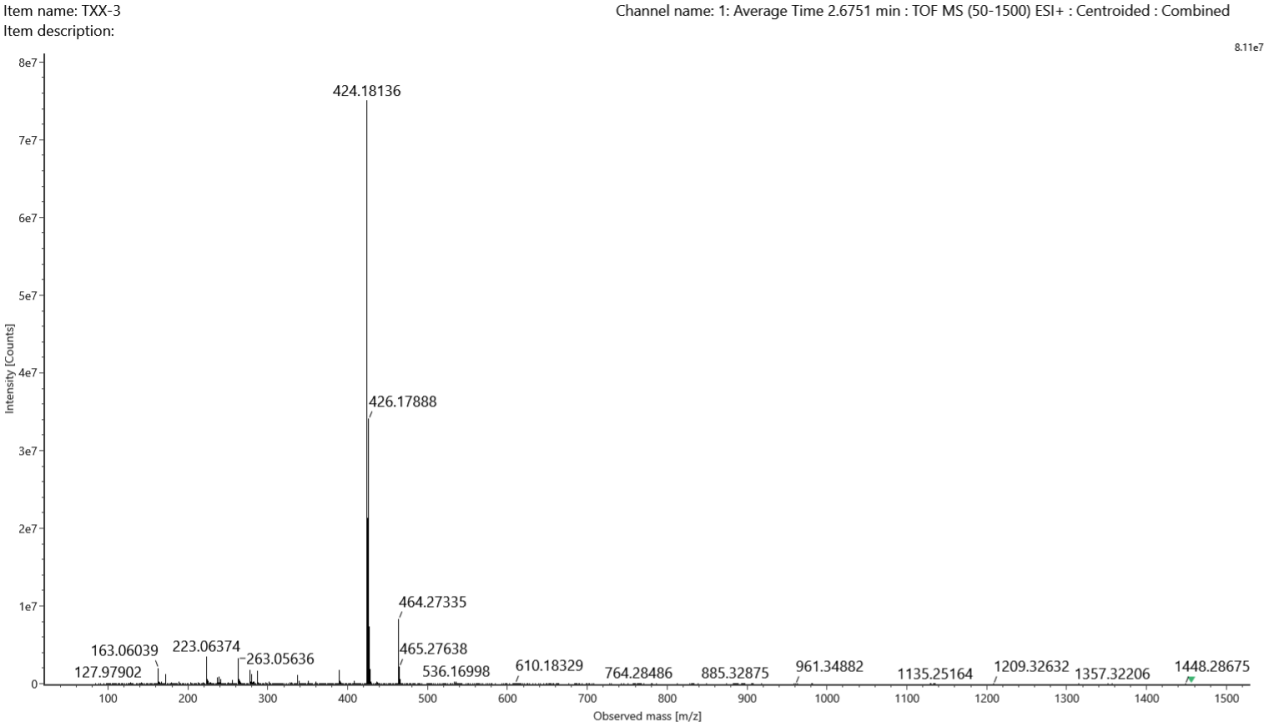


**Figure S12.** HRMS (ESI) for compound **3d.**


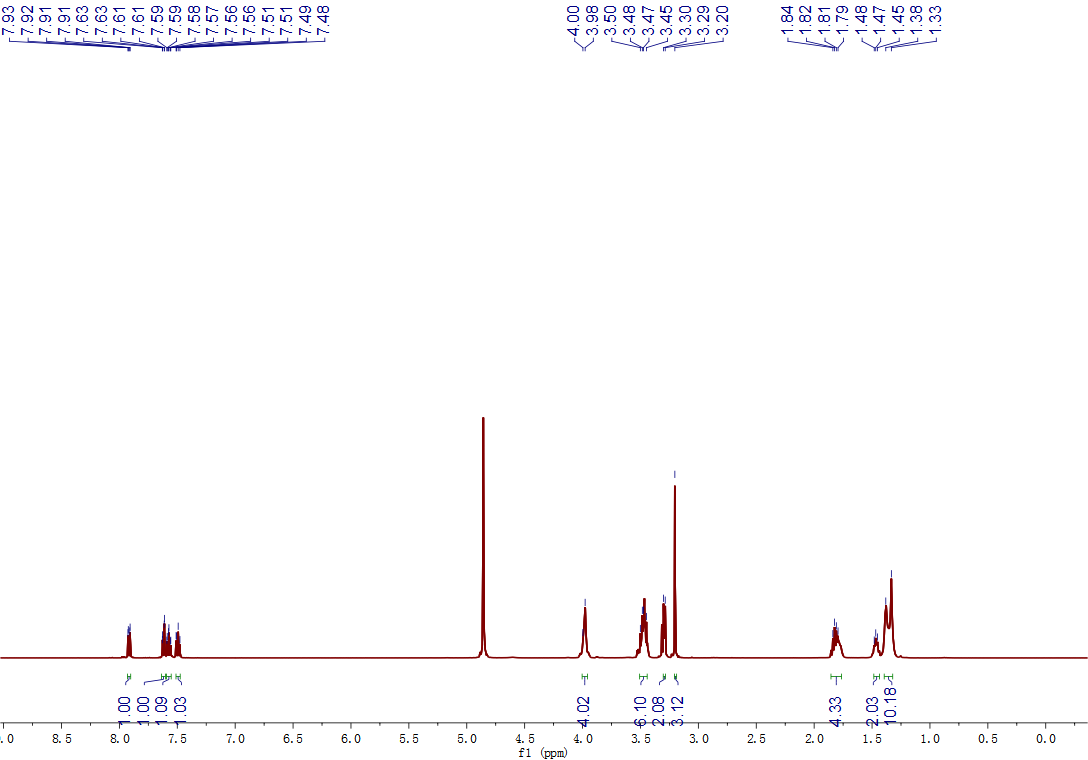


**Figure S13.** 1H NMR spectrum (CD3OD, 500 MHz) of **3e**


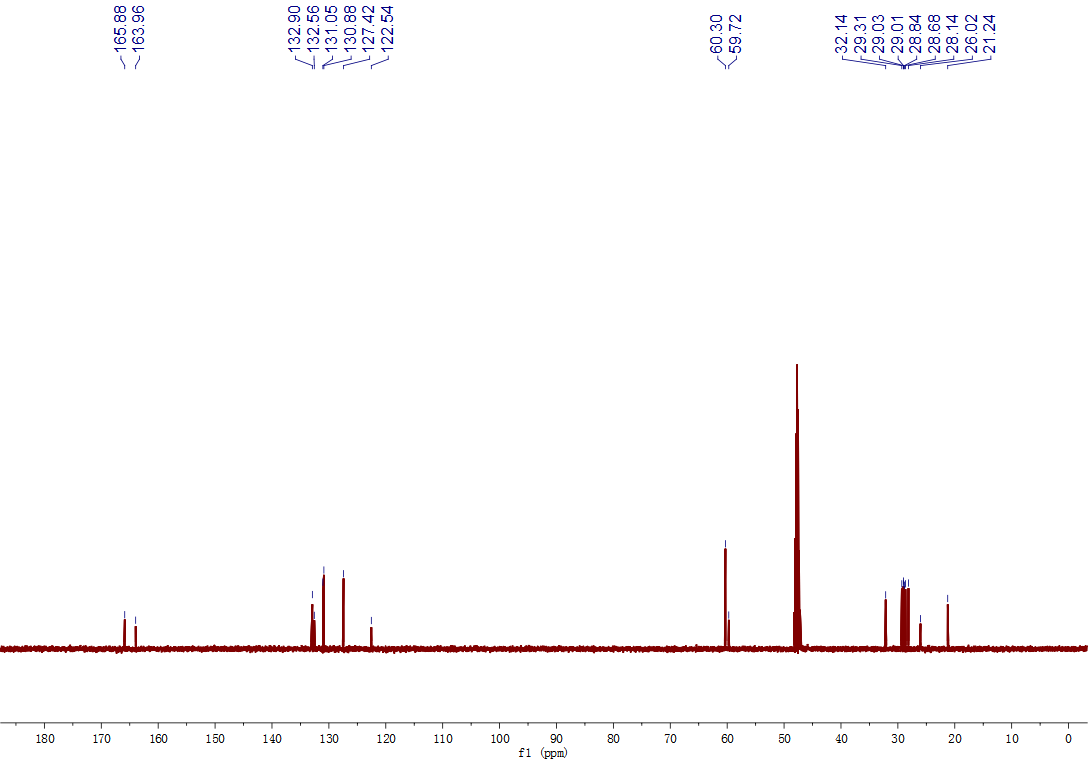


**Figure S14.** 13C NMR spectrum (CD3OD, 126 MHz) of **3e.**


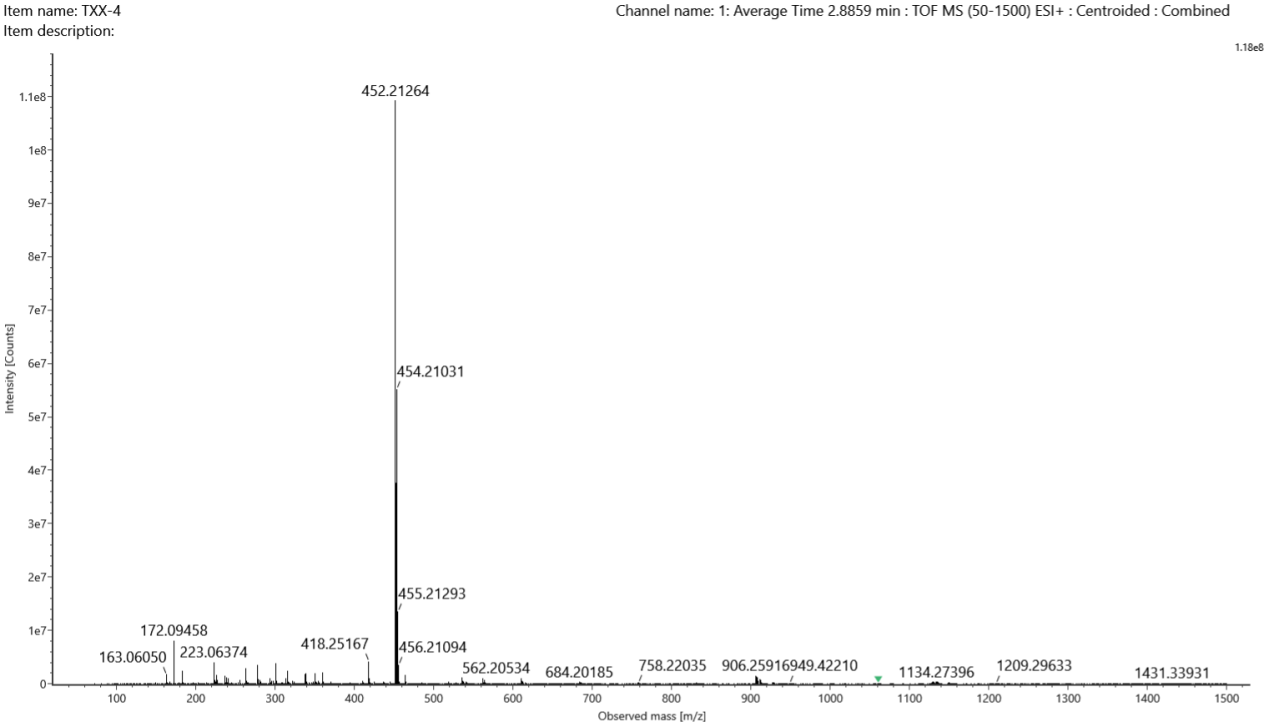


**Figure S15.** HRMS (ESI) for compound **3e.**

**
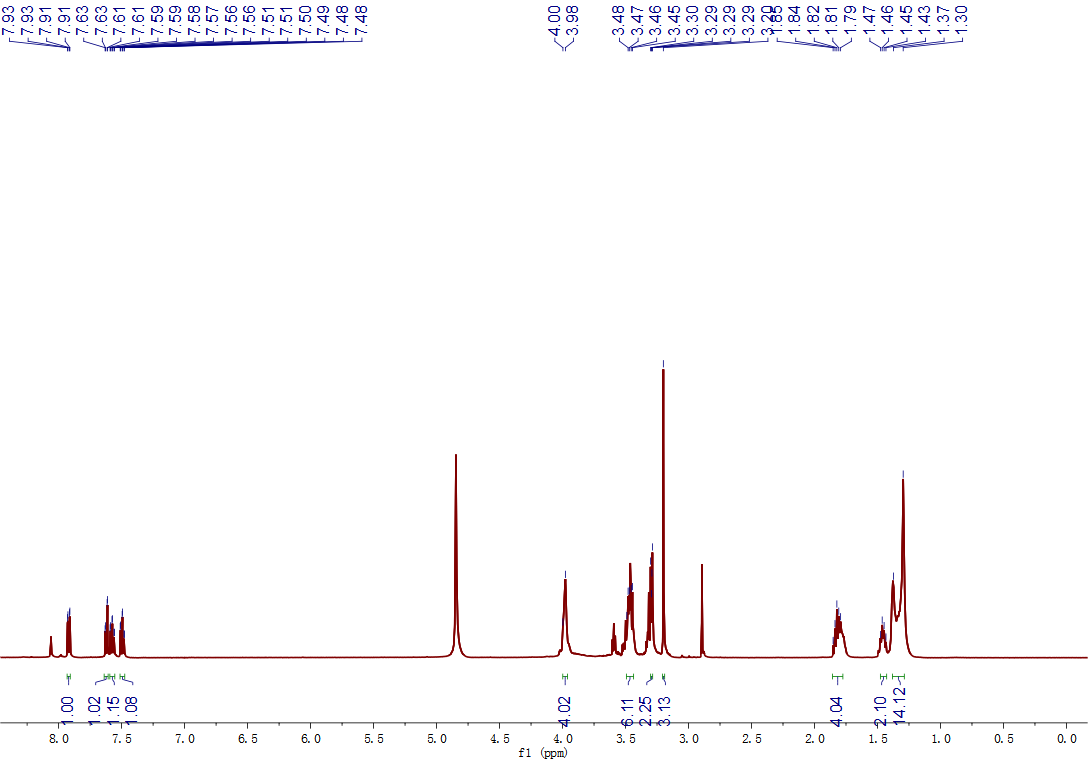
**

**Figure S16.** 1H NMR spectrum (CD3OD, 500 MHz) of **3f.**

**
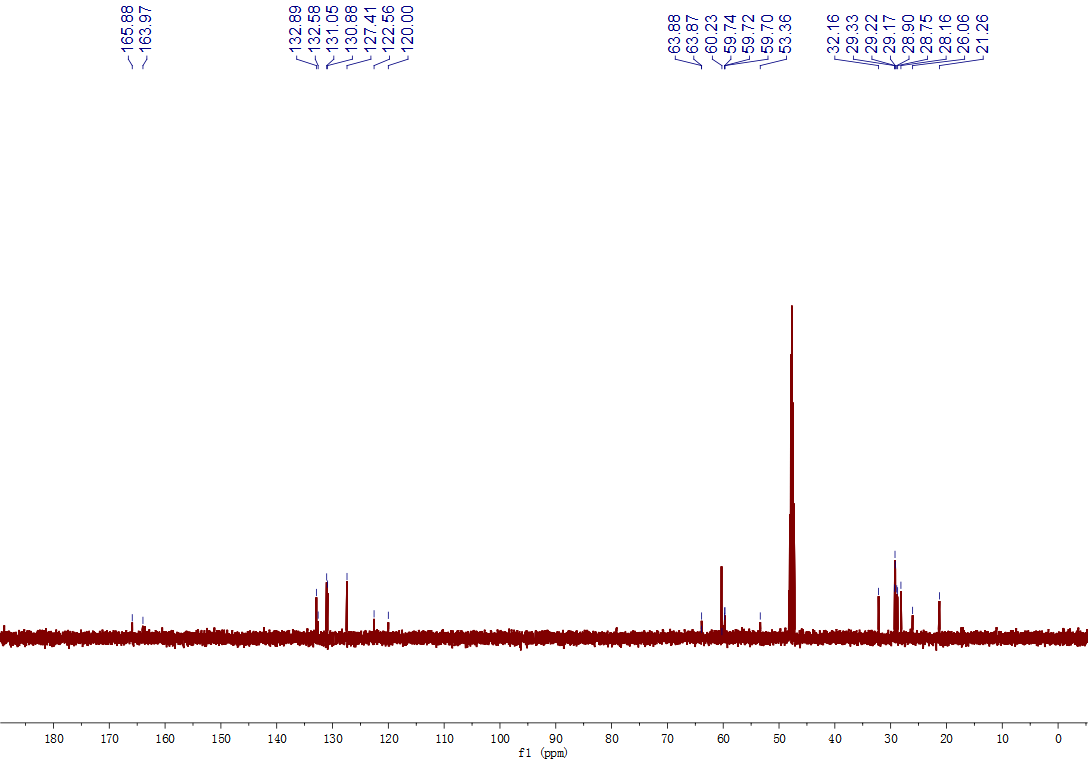
**

**Figure S17.** 13C NMR spectrum (CD3OD, 126 MHz) of **3f.**


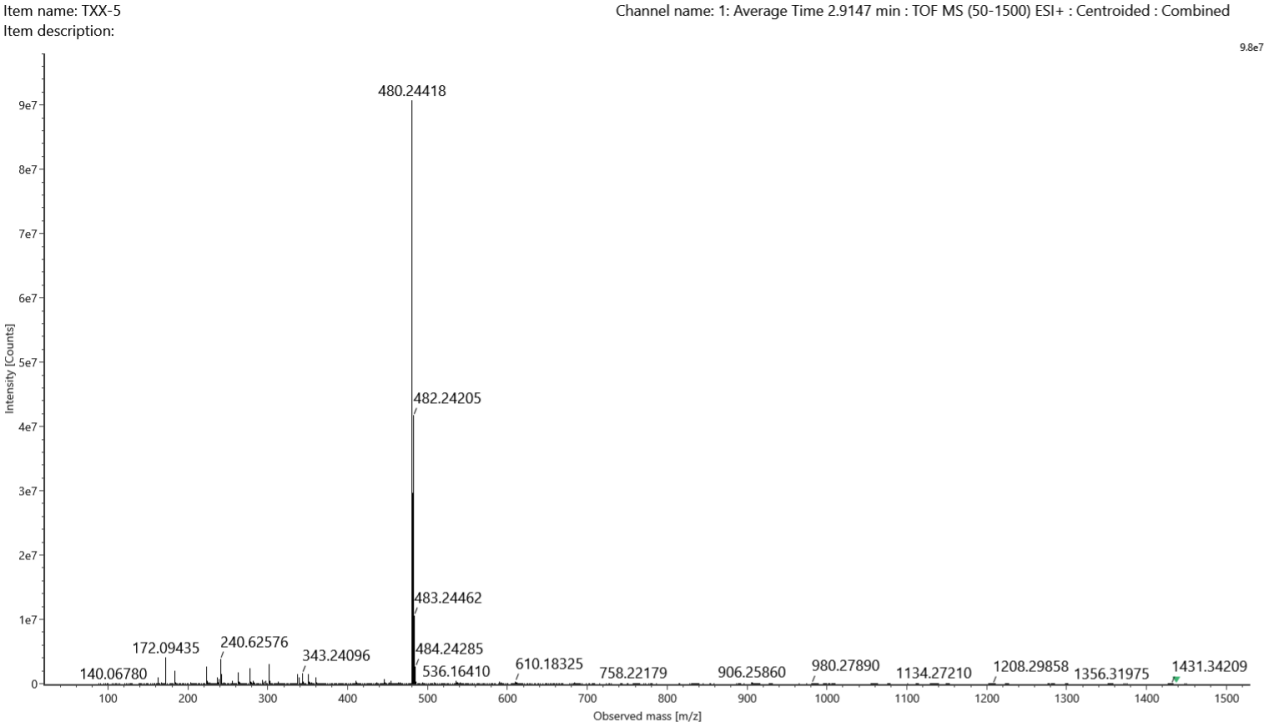


**Figure S18.** HRMS (ESI) for compound **3f.**

**
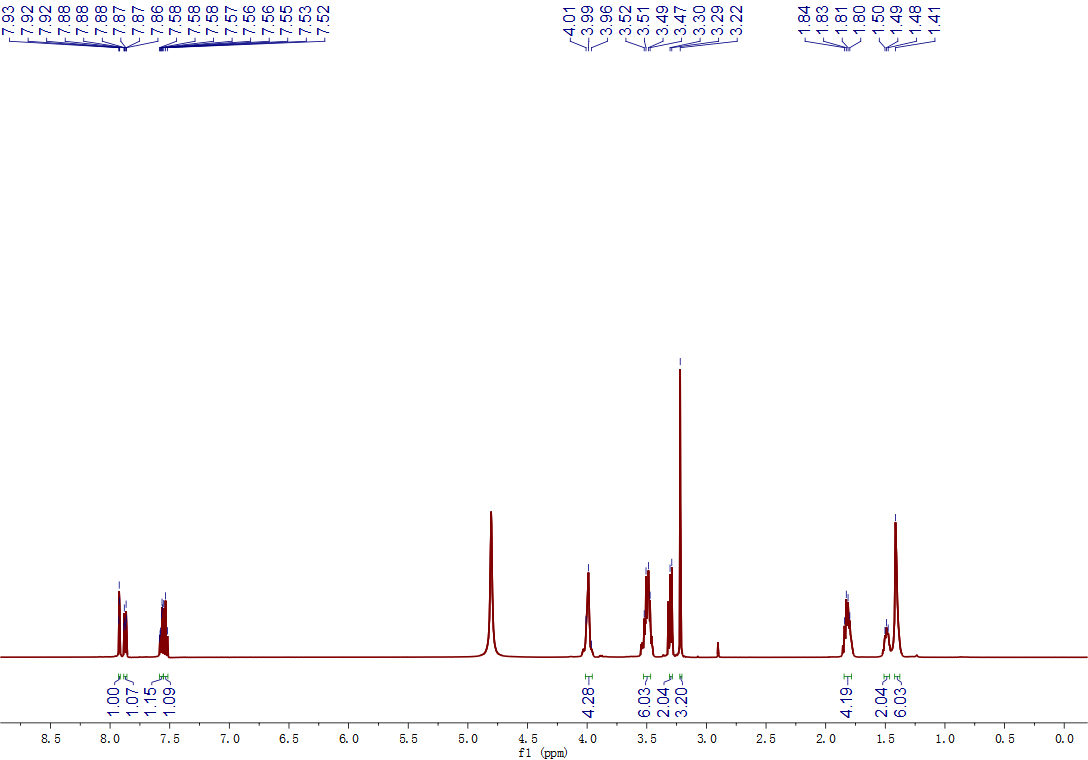
**

**Figure S19.** 1H NMR spectrum (CD3OD, 500 MHz) of **3g.**

**
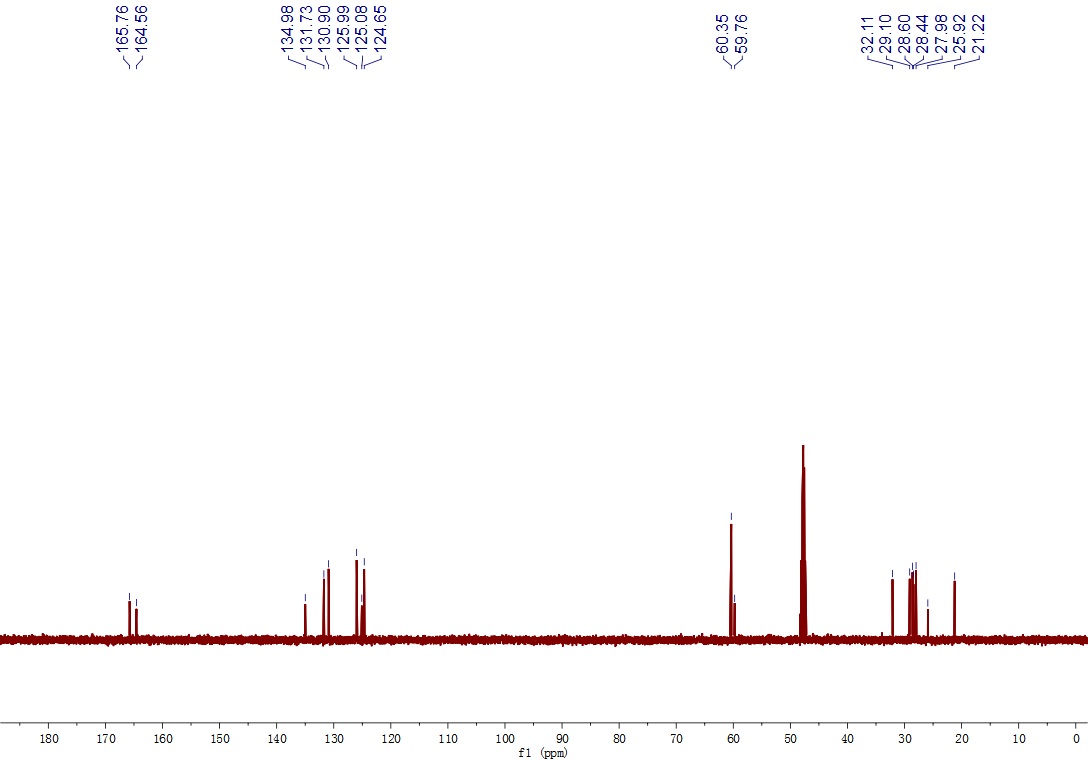
**

**Figure S20.** 13C NMR spectrum (CD3OD, 126 MHz) of **3g.**


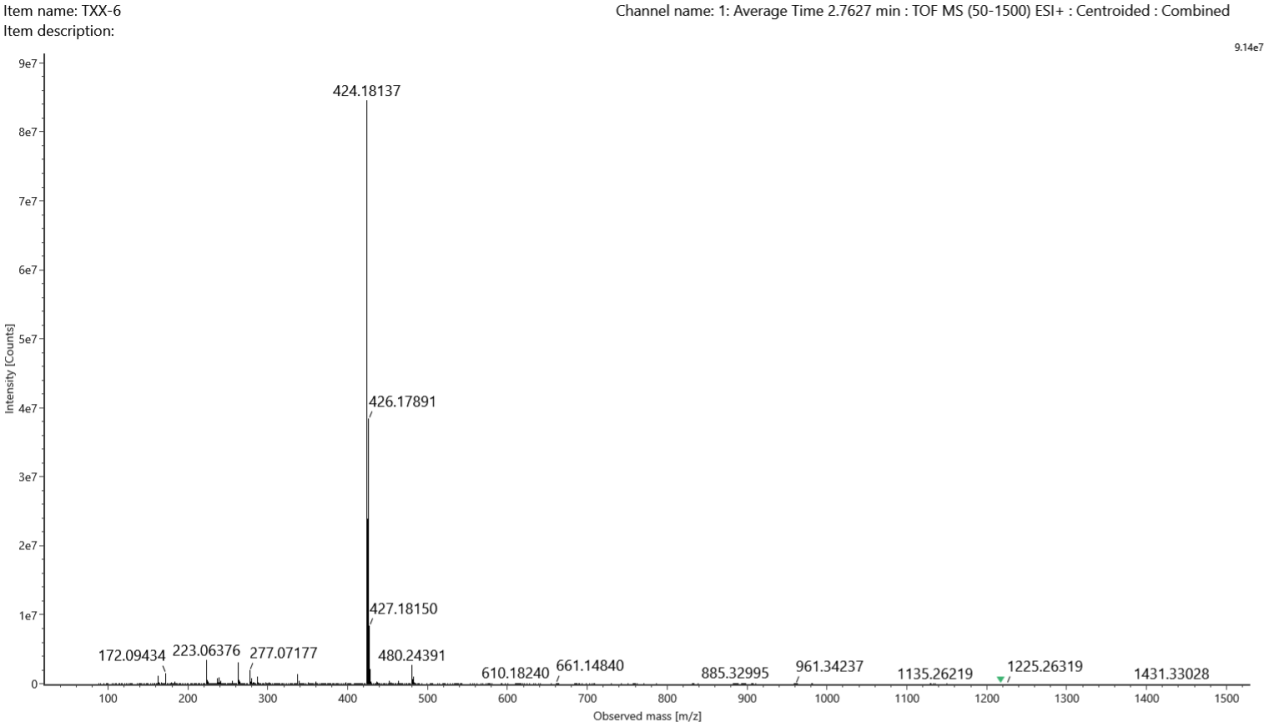


**Figure S21.** HRMS (ESI) for compound of **3g.**

**
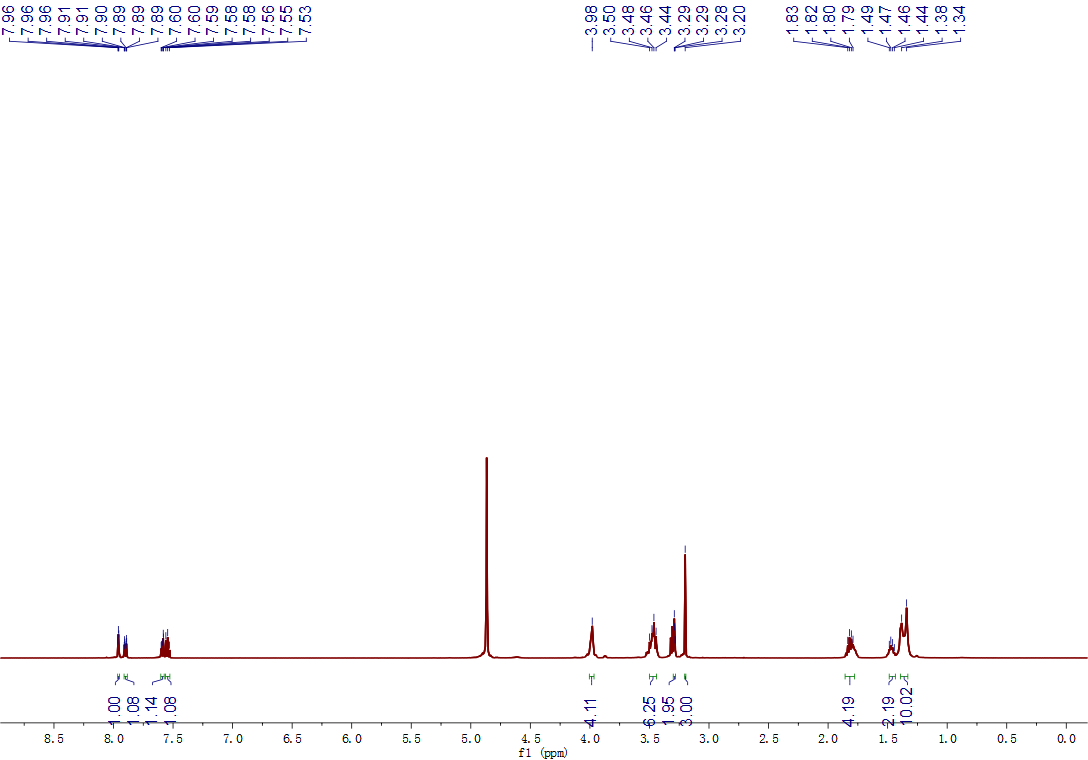
**

**Figure S22.** 1H NMR spectrum (CD3OD, 500 MHz) of **3h.**

**
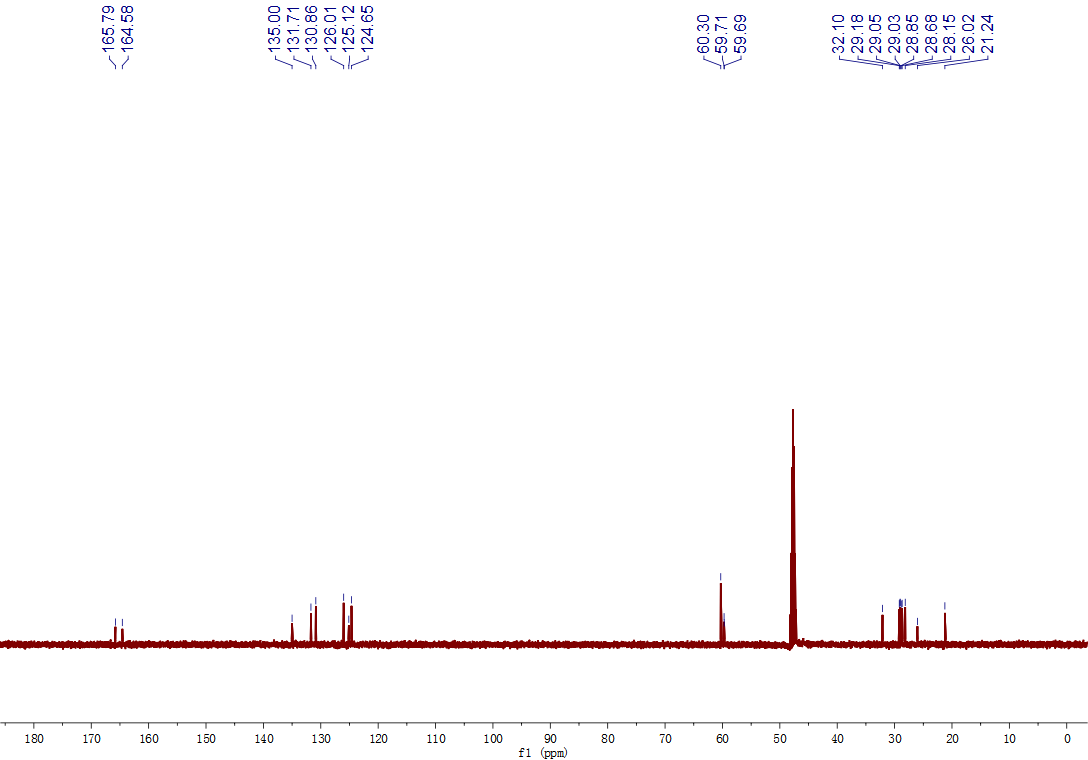
**

**Figure S23.** 13C NMR spectrum (CD3OD, 126 MHz) of **3h.**


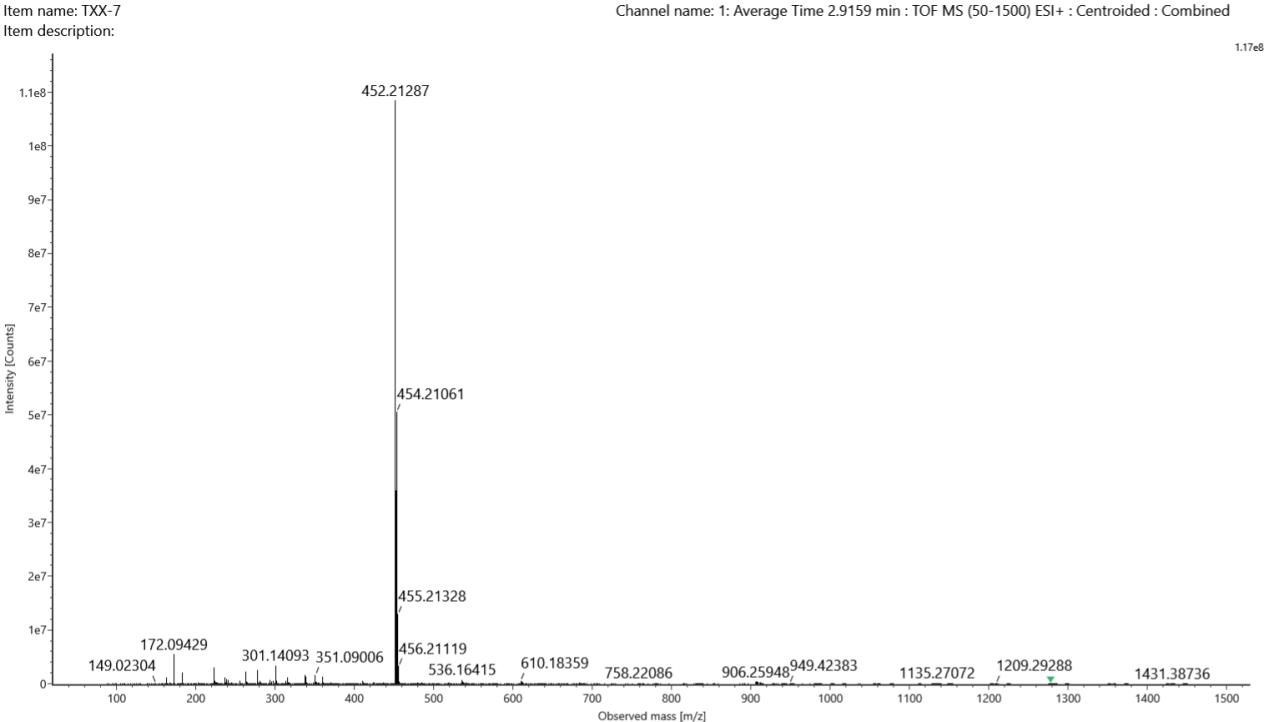


**Figure S24.** HRMS (ESI) for compound **3h.**

**
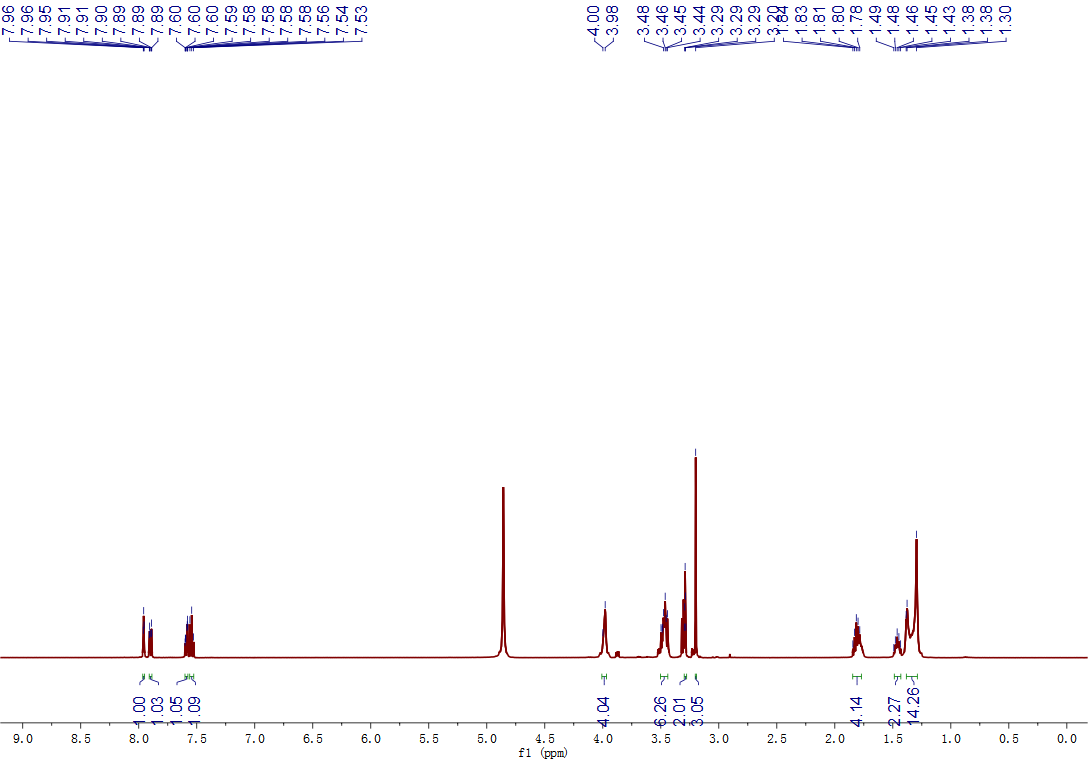
**

**Figure S25.** 1H NMR spectrum (CD3OD, 500 MHz) of **3i.**

**
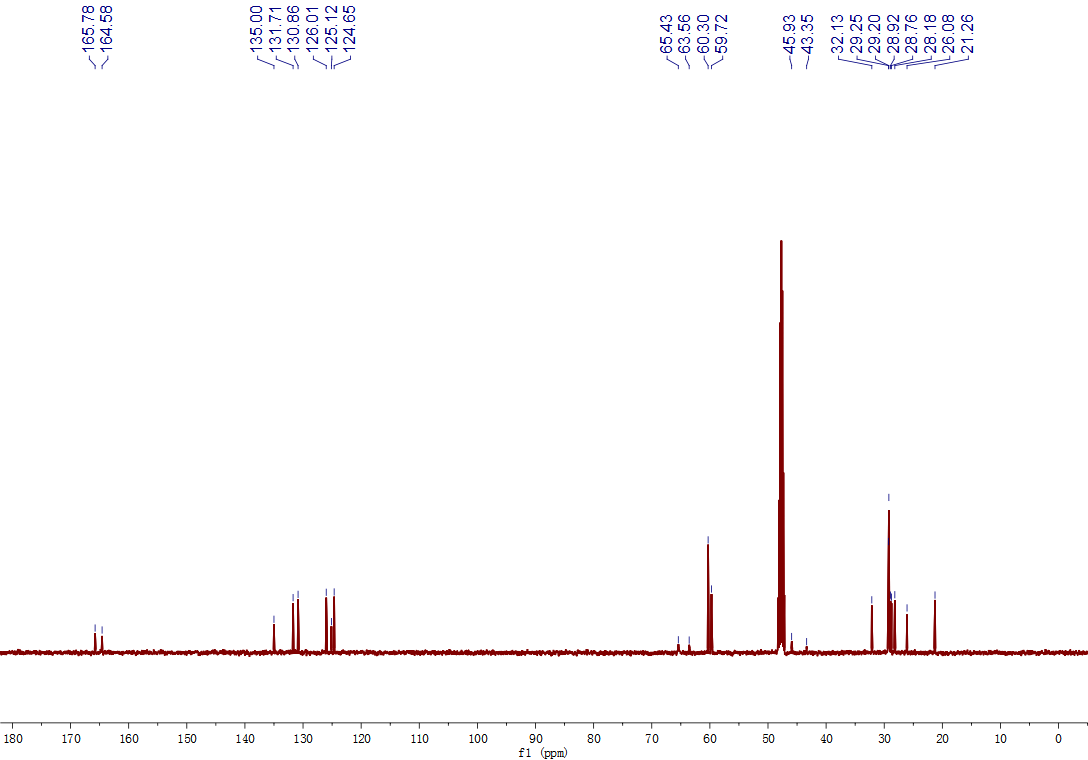
**

**Figure S26.** 13C NMR spectrum (CD3OD, 126 MHz) of **3i.**


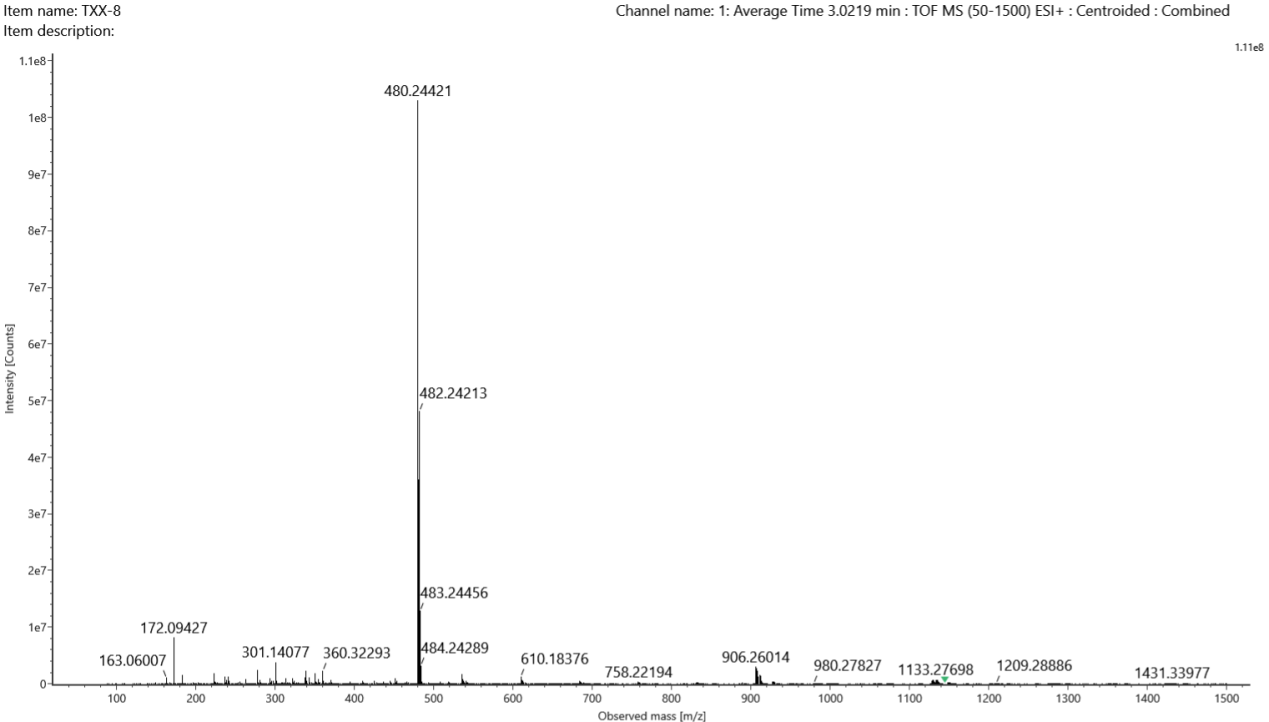


**Figure S27.** HRMS (ESI) for compound **3i.**

**
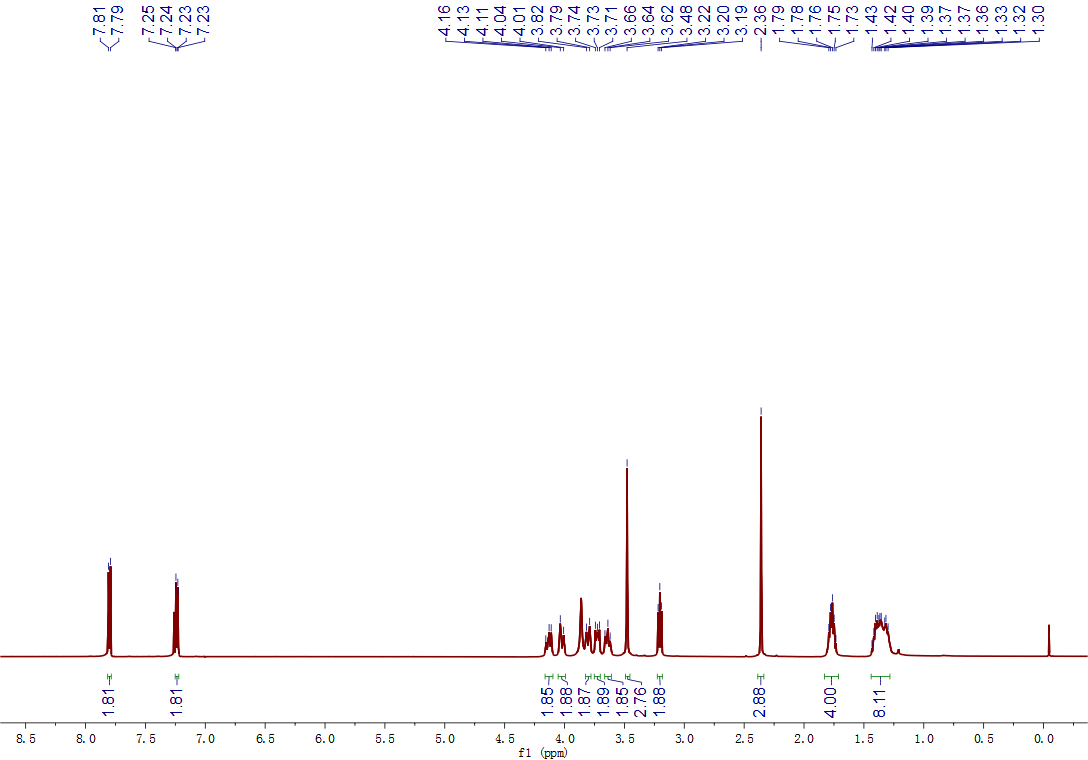
**

**Figure S28.** 1H NMR spectrum (CDCl3, 500 MHz) of **3j.**

**
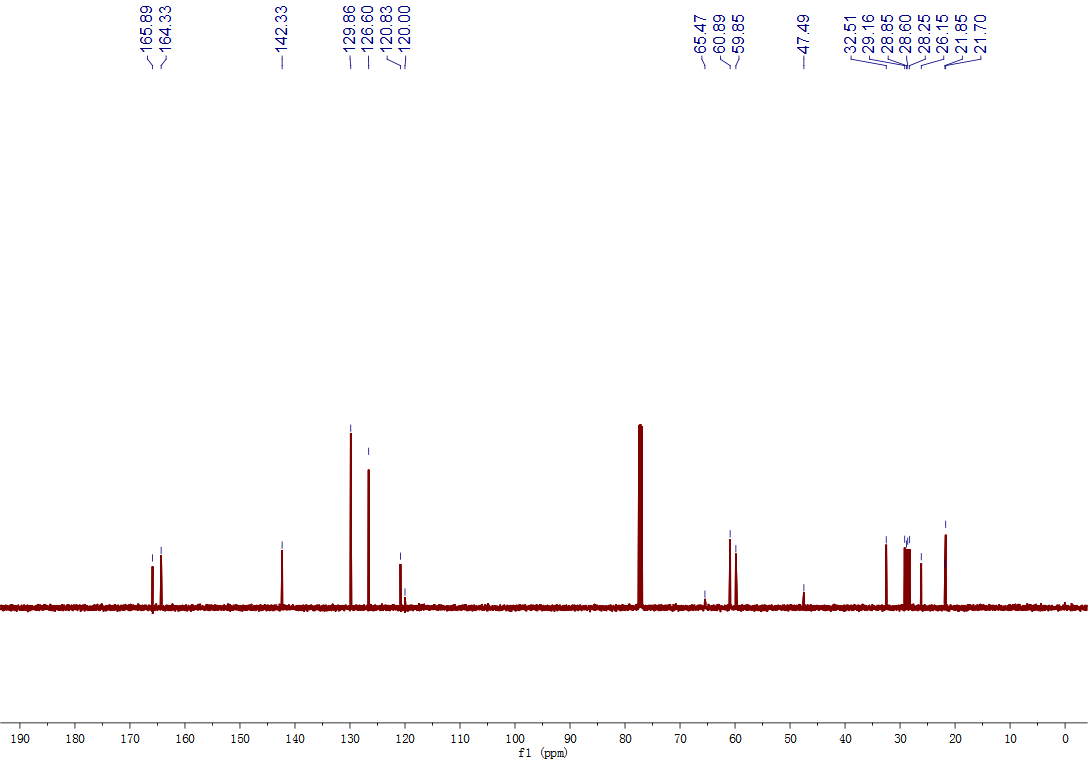
**

**Figure S29.** 13C NMR spectrum (CDCl3, 126 MHz) of **3j.**


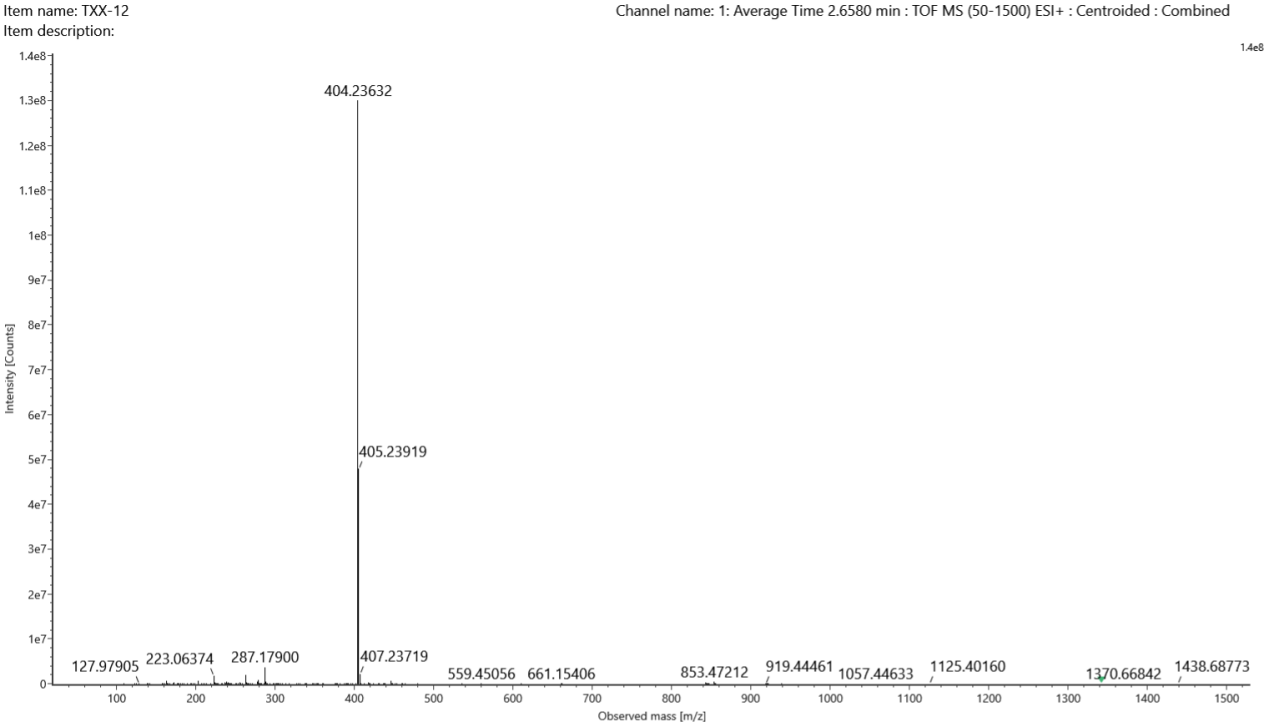


**Figure S30.** HRMS (ESI) for compound **3j.**

**
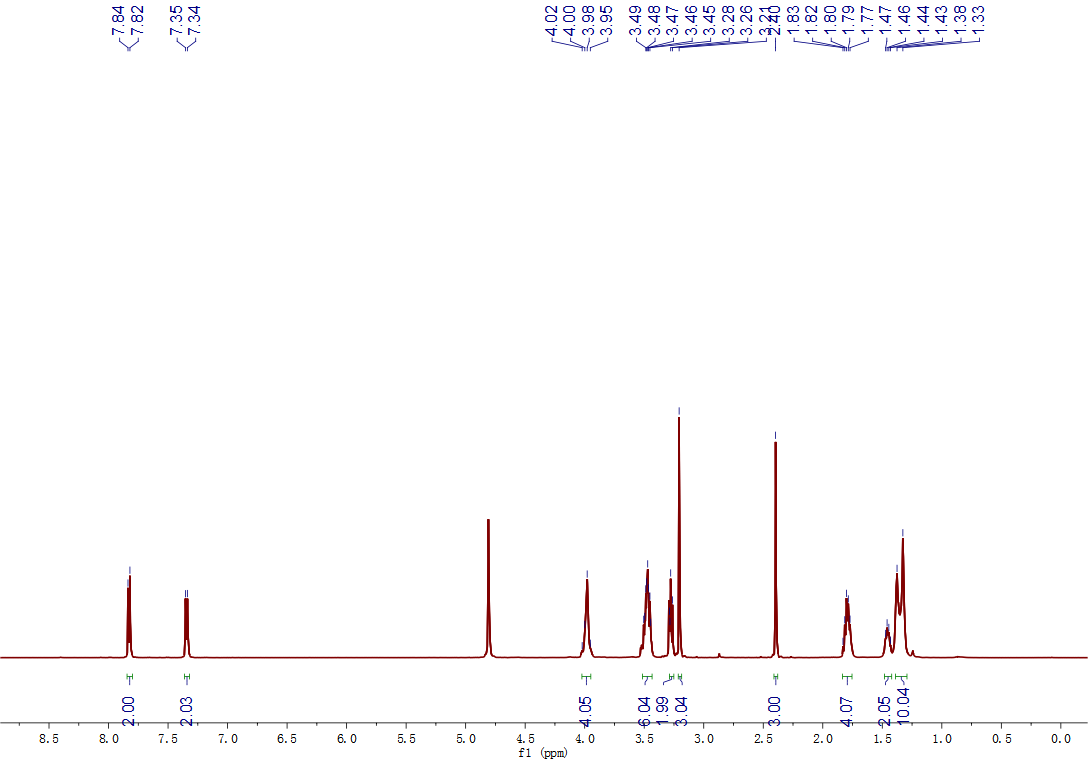
**

**Figure S31.** 1H NMR spectrum (CD3OD, 500 MHz) of **3k.**

**
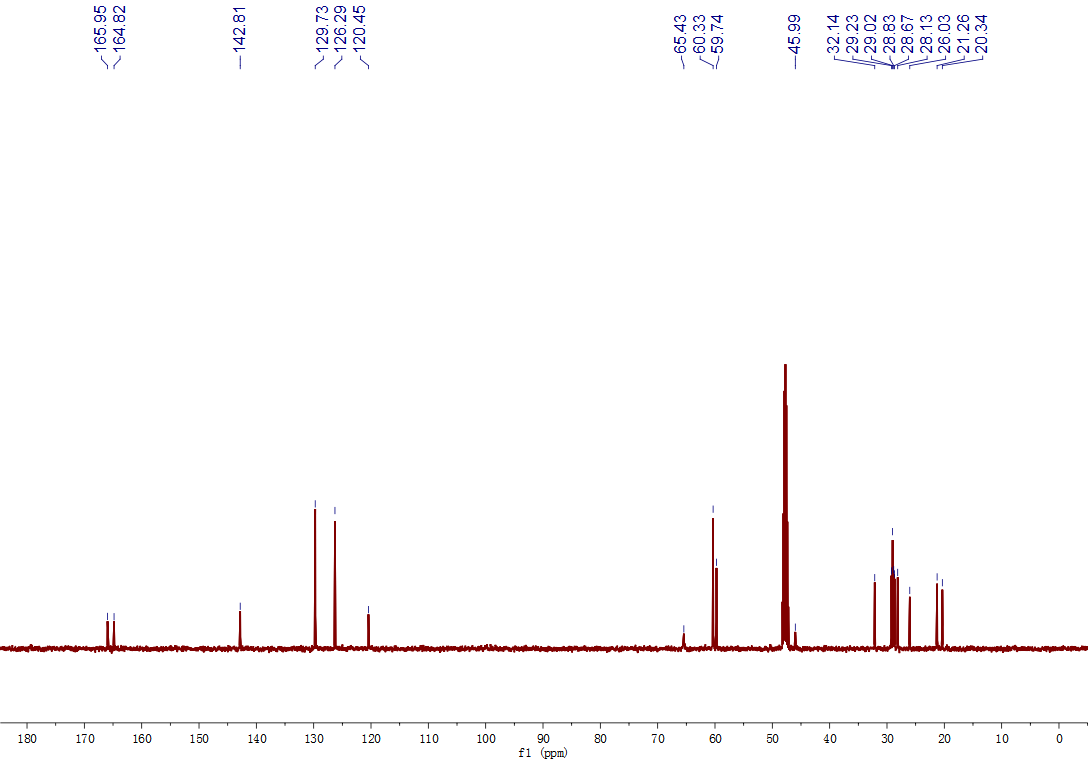
**

**Figure S32.** 13C NMR spectrum (CD3OD, 126 MHz) of **3k.**


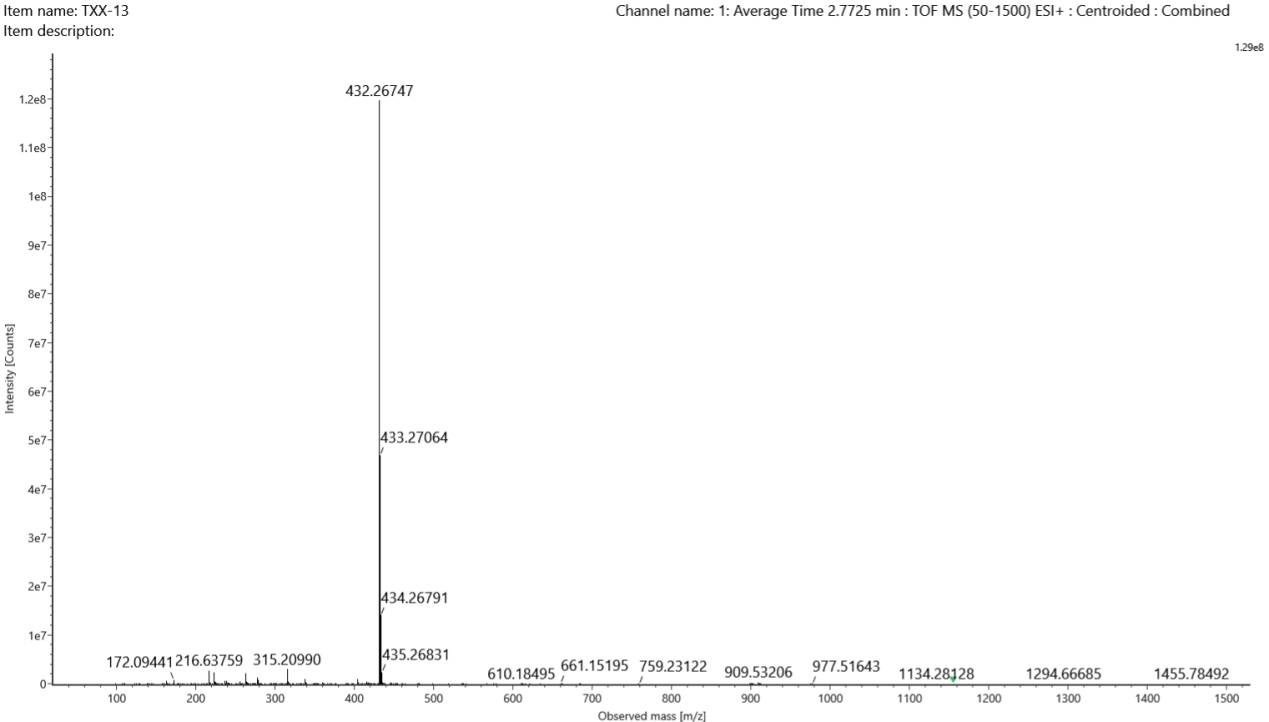


**Figure S33.** HRMS (ESI) for compound **3k.**

**
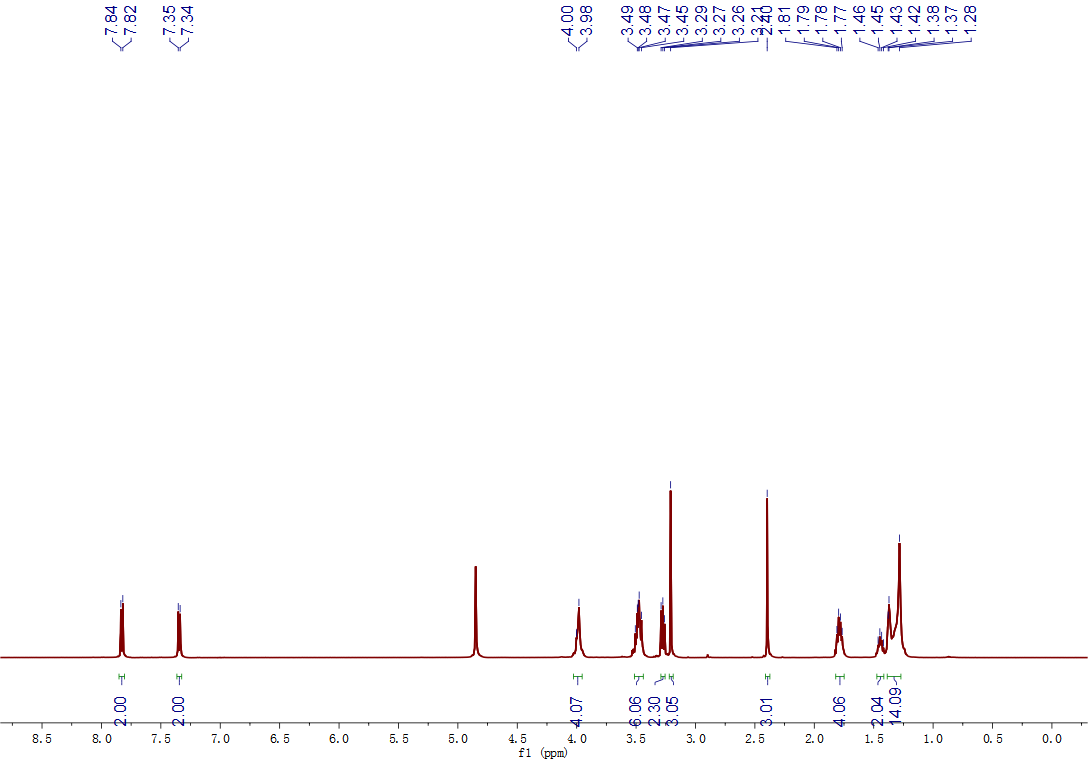
**

**Figure S34.** 1H NMR spectrum (CD3OD, 500 MHz) of **3l.**

**
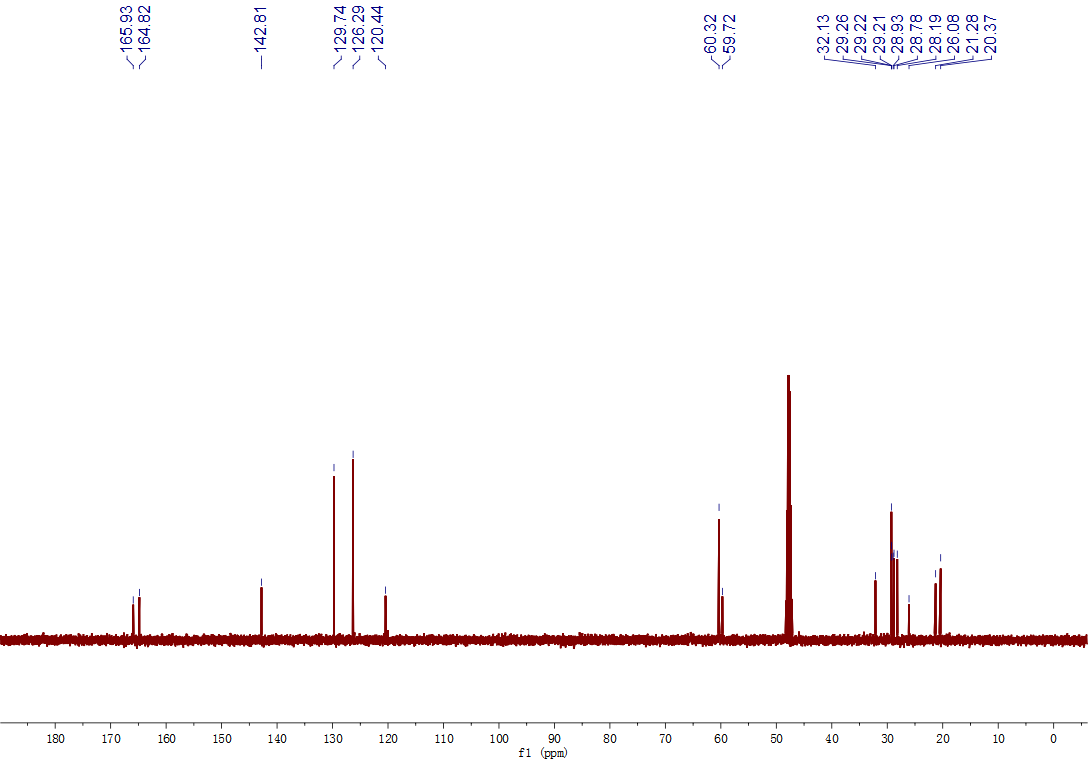
**

**Figure S35.** 13C NMR spectrum (CD3OD, 126 MHz) of **3l.**


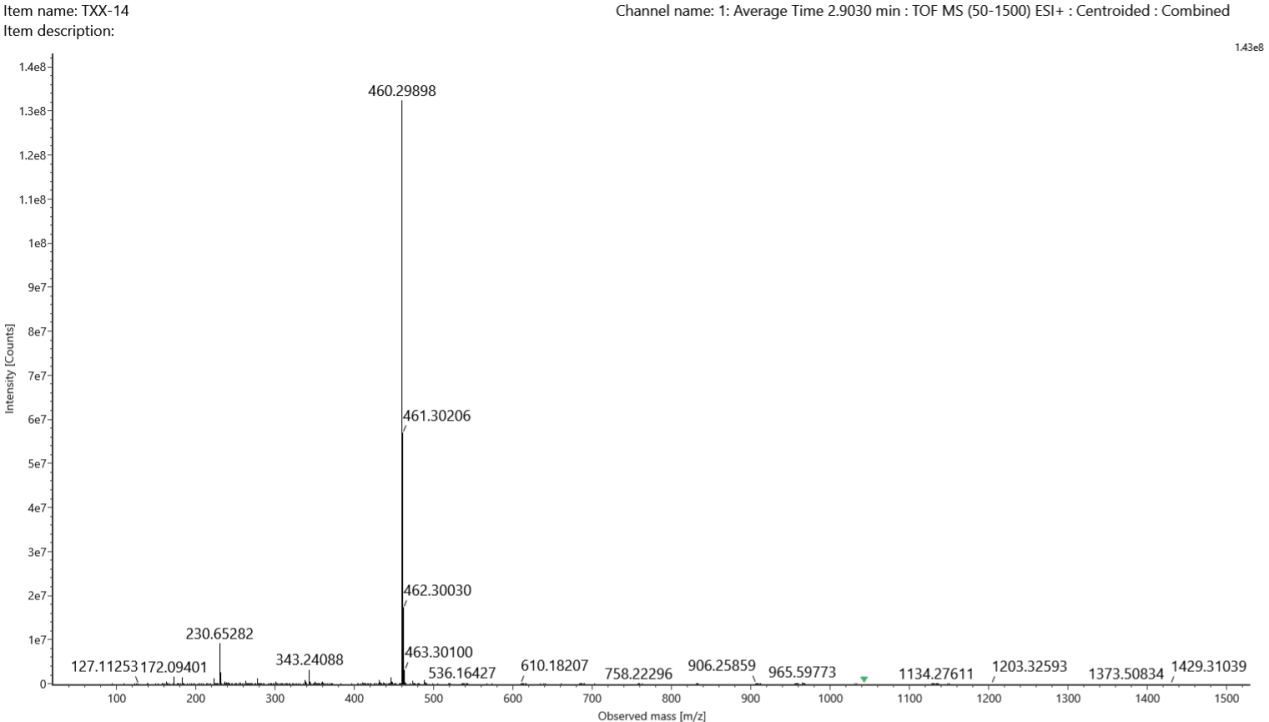


**Figure S36.** HRMS (ESI) for compound **3l.**


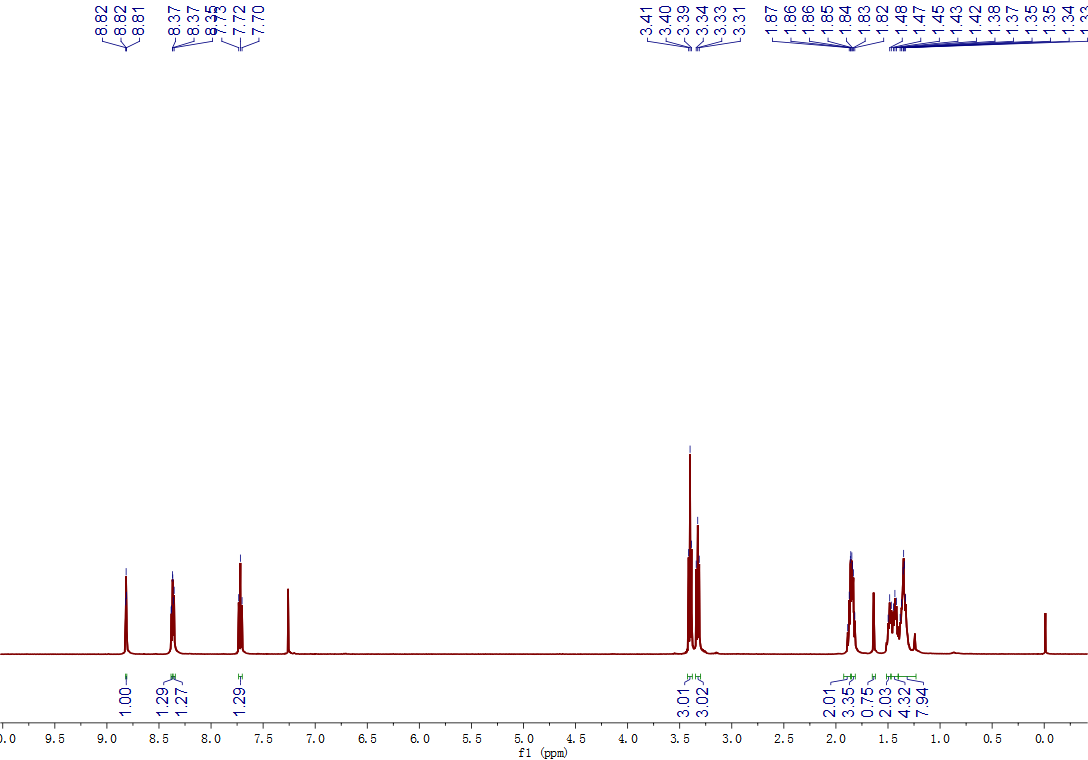


**Figure S37.** 1H NMR spectrum (CDCl3, 500 MHz) of **3m.**


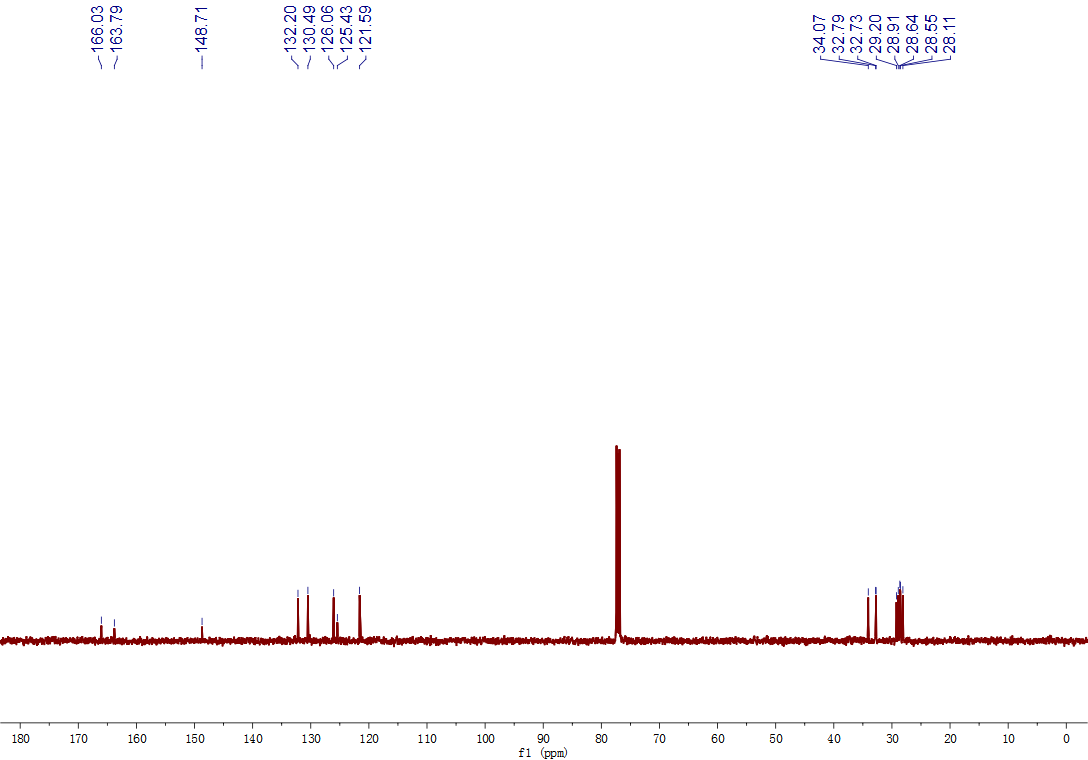


**Figure S38.** 13C NMR spectrum (CDCl3, 126 MHz) of **3m.**


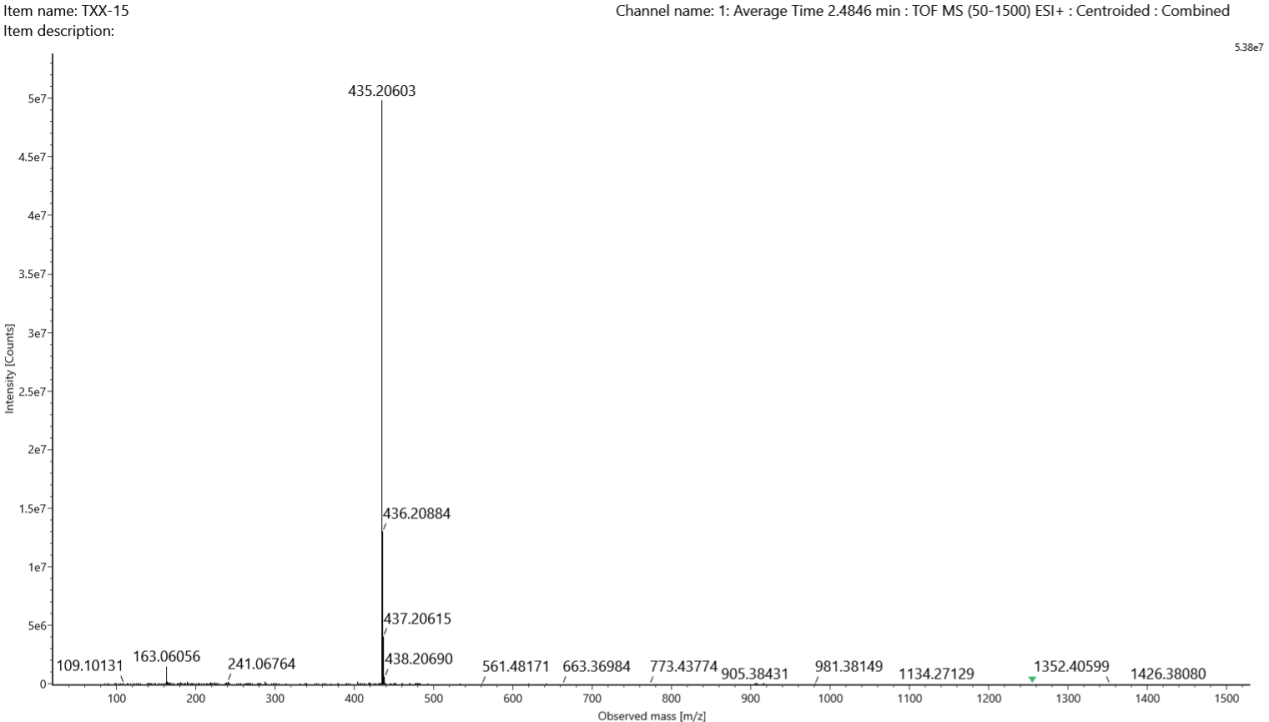


**Figure S39.** HRMS (ESI) for compound **3m.**

**
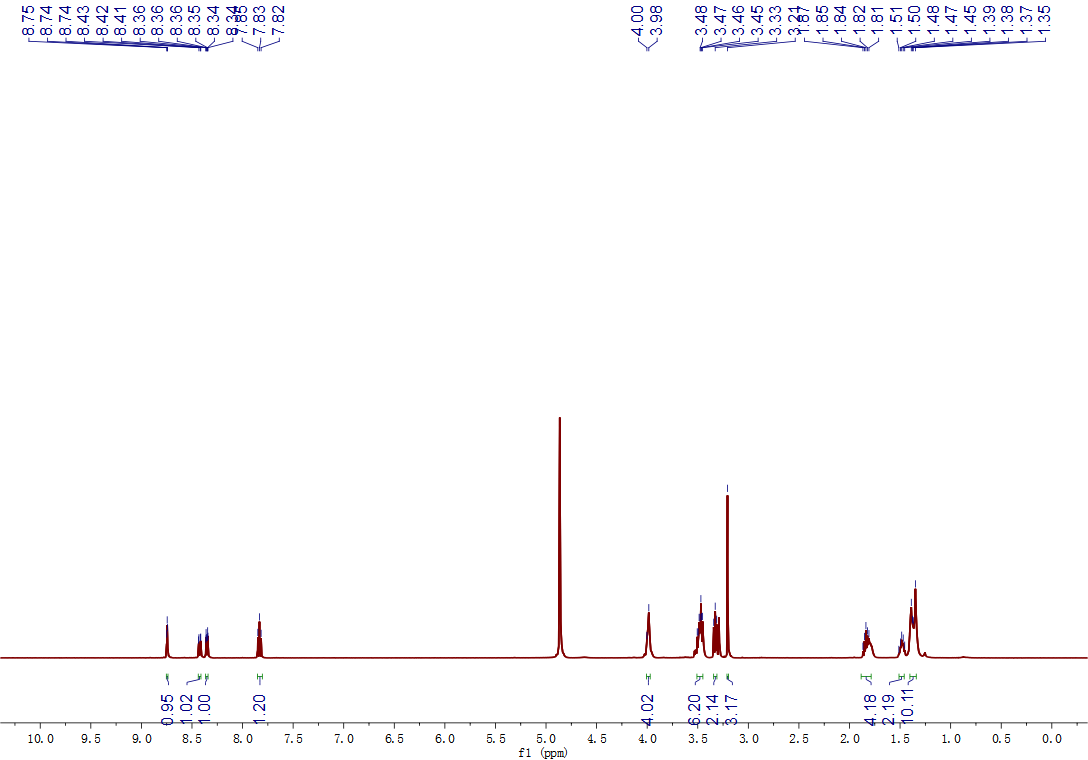
**

**Figure S40.** 1H NMR spectrum (CD3OD, 500 MHz) of **3n.**

**
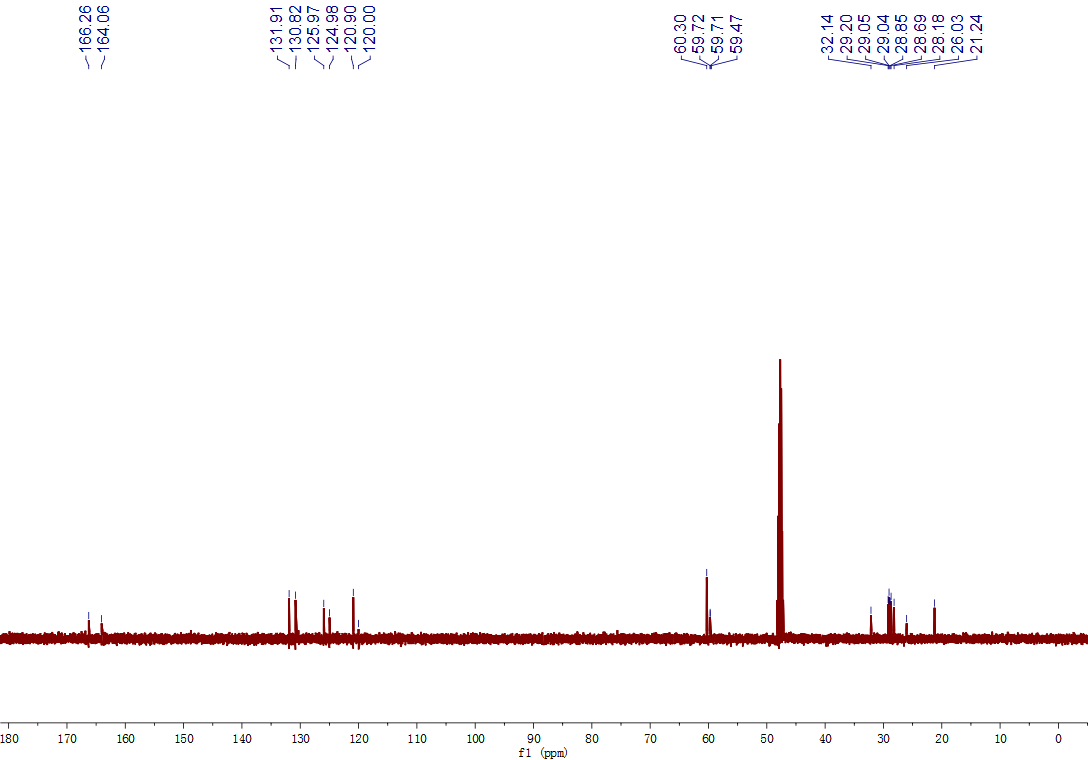
**

**Figure S41.** 13C NMR spectrum (CD3OD, 126 MHz) of **3n.**


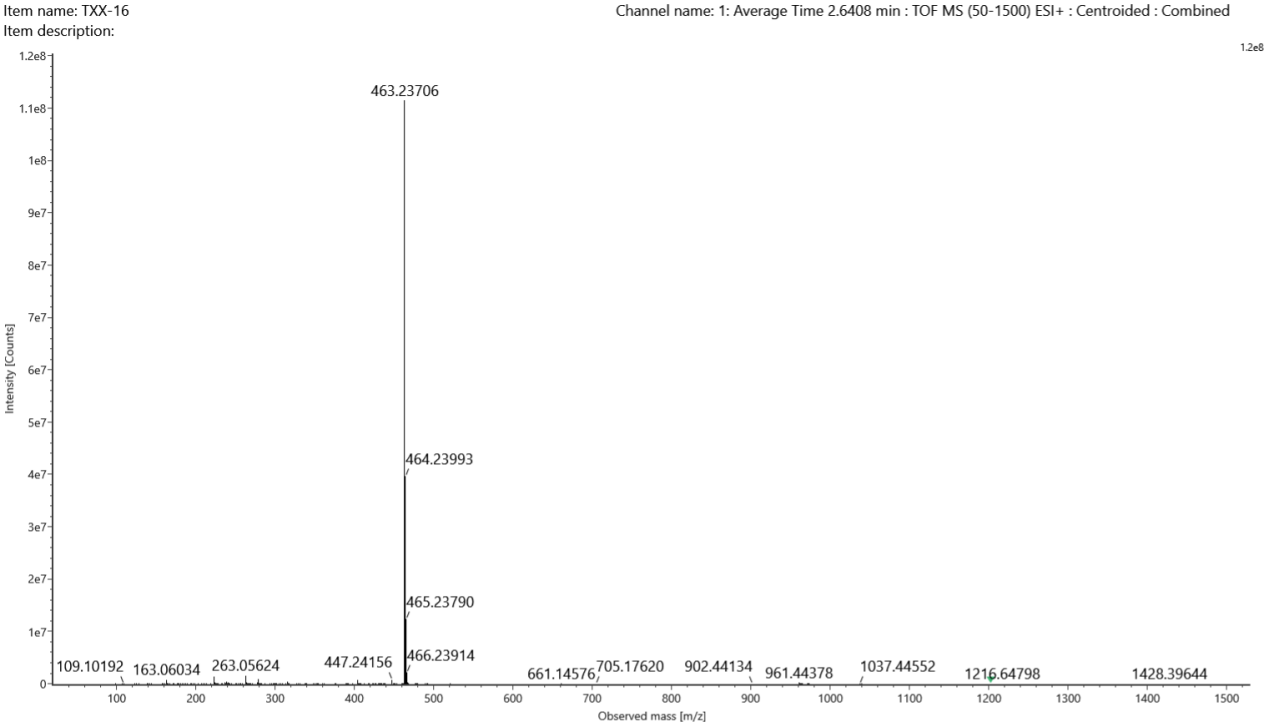


**Figure S42.** HRMS (ESI) for compound **3n.**


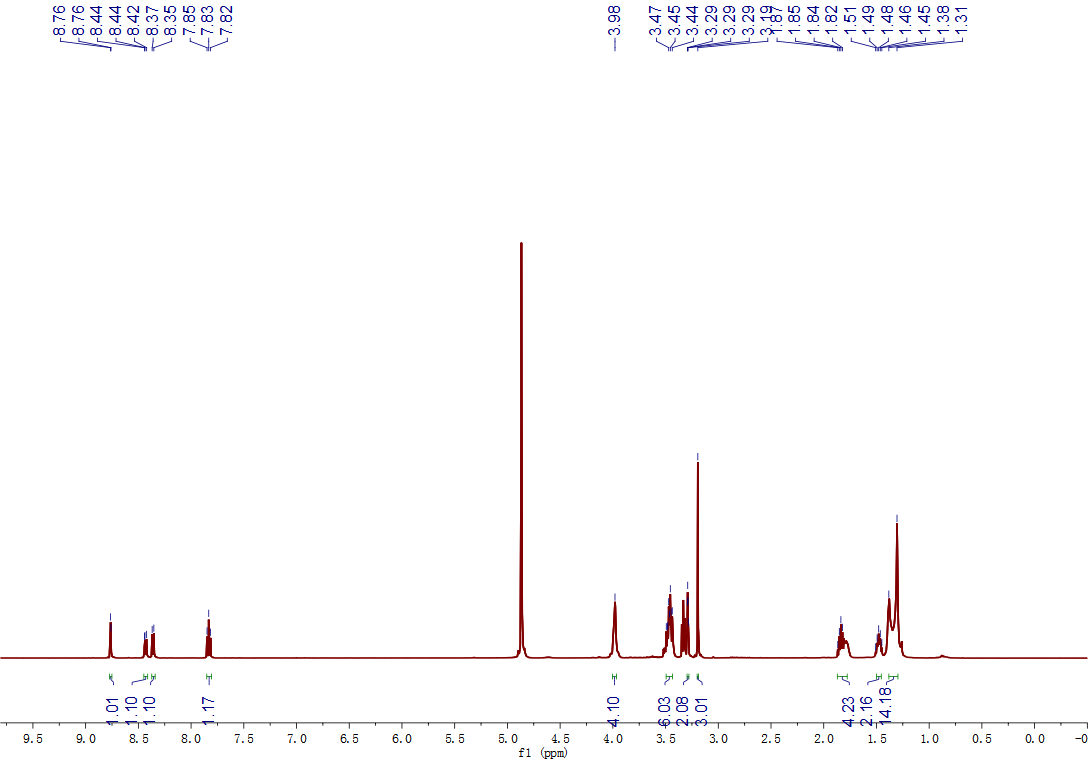


**Figure S43.** 1H NMR spectrum (CD3OD, 500 MHz) of **3o.**


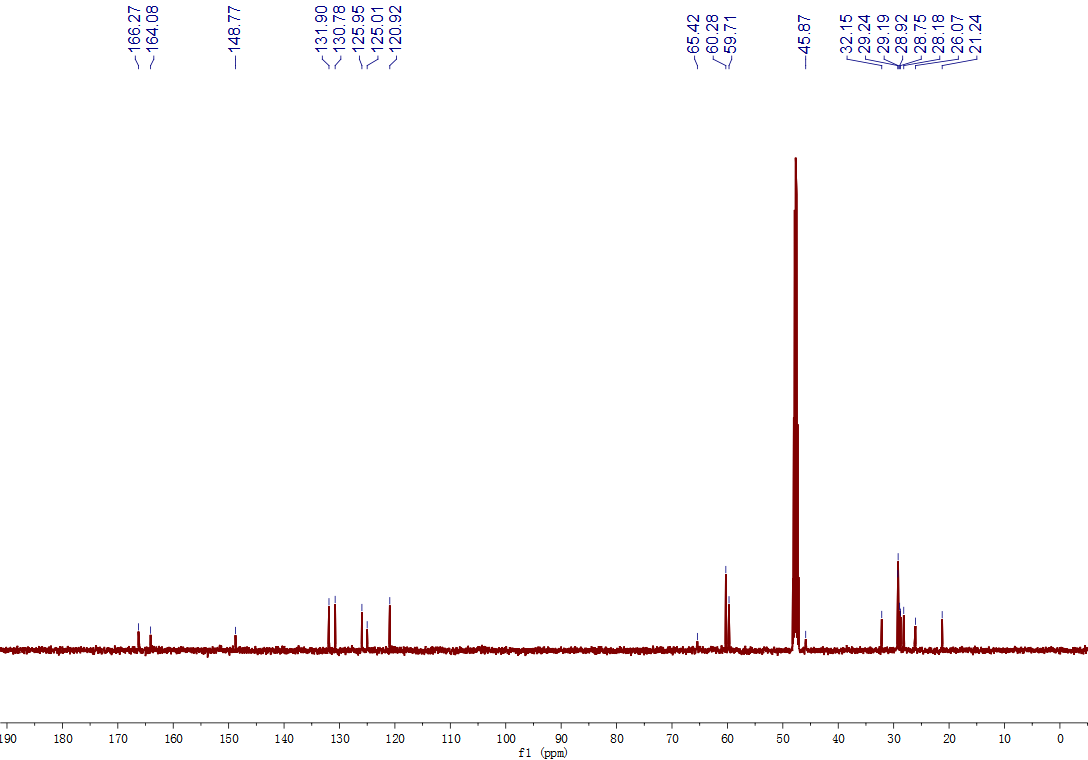


**Figure S44.** 13C NMR spectrum (CD3OD, 126 MHz) of **3o.**

**Figure S45.** HRMS (ESI) for compound **3o.**

**2. ANOVA and Post Hoc analysis of EC50 against *Xoo***

2.1 One-Way ANOVA analysis:


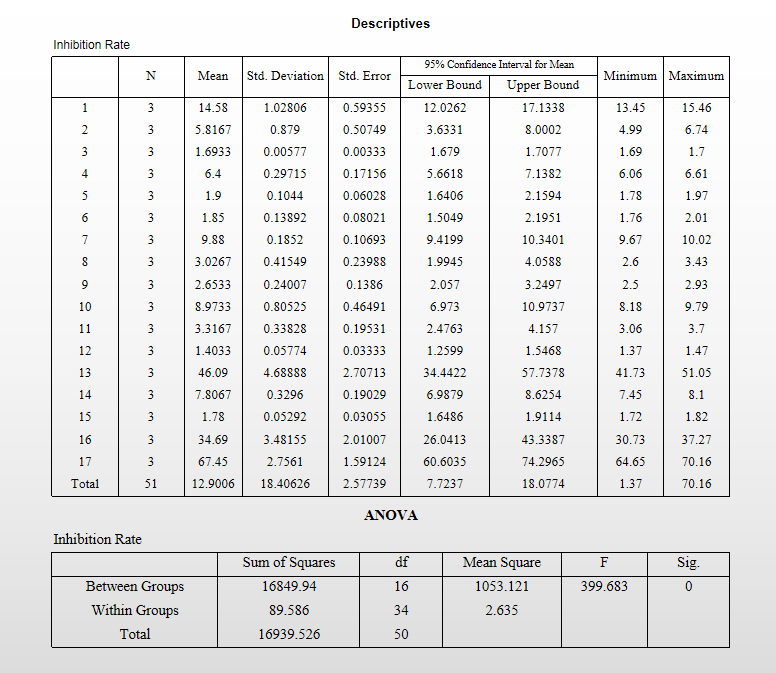


In this analysis, variance analysis: each sample number (1-17) is assigned based on the compounds’ number from Table 1, “1-15” represent compounds **3a-3o**, “16” represents control drug BT, “17” represents control drug TC. From the above analysis, a significant difference was observed among the treatment groups because Sig. is 0 ˂ 0.05.

2.2 Post Hoc Tests:


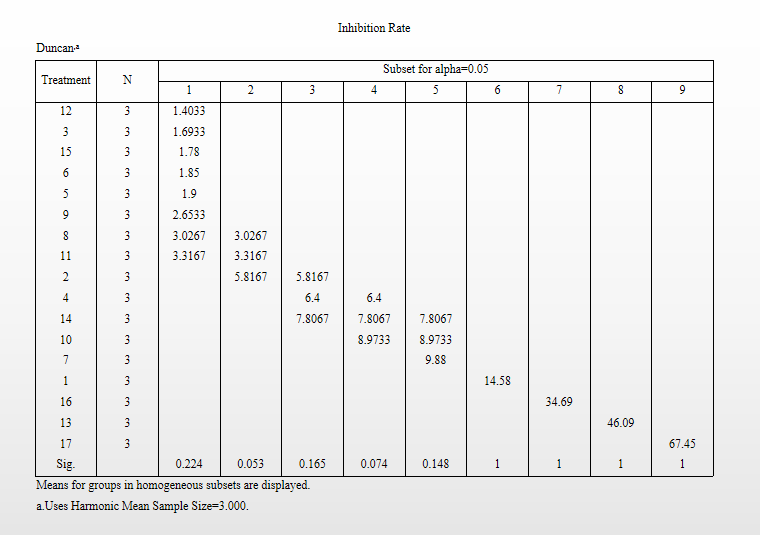


In this analysis, the 9 columns from right to left are marked with A, B, C, D, E, F, G, H, and I, then the following numbers including 17, 13, 16, 1, 7, 10, 14, 4, 2, 11, 8, 9, 5, 6, 15, 3, and 12, were labeled as A, B, C, D, E, EF, EFG, FG, GH, HI, HI, I, I, I, I, I, and I, respectively. From the above analysis, there was no significant difference between treatments with the same letter; By contrast, there was a significant difference between treatments without the same letter.

**3. ANOVA and Post Hoc analysis of EC50 against *Xac***

3.1 One-Way ANOVA analysis:


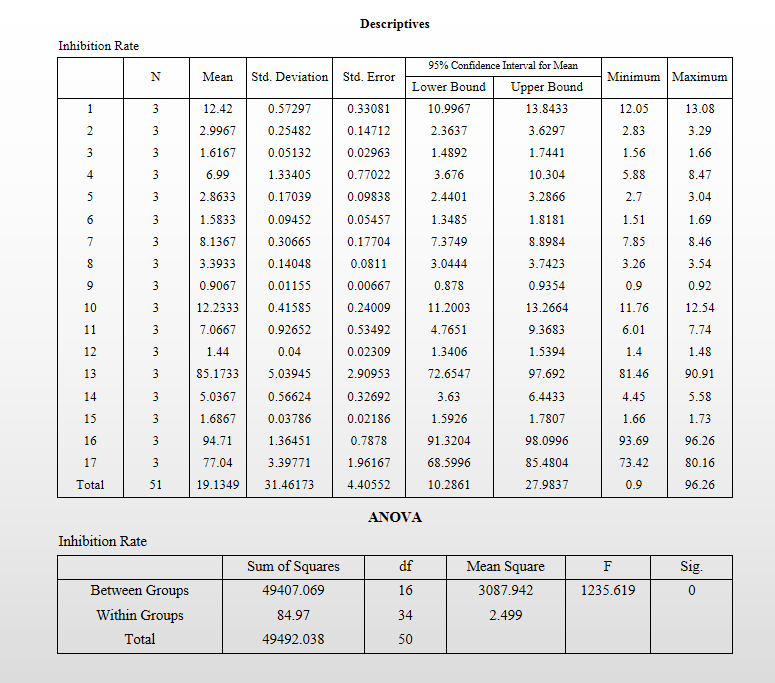


Variance analysis: each sample number (1-17) is assigned based on the compounds’ number from Table 2, “1-15” represent compounds **3a-3o**, “16” represents control drug BT, “17” represents control drug TC. From the above analysis, a significant difference was observed among the treatment groups because Sig. is 0 ˂ 0.05.

3.2 Post Hoc Tests:


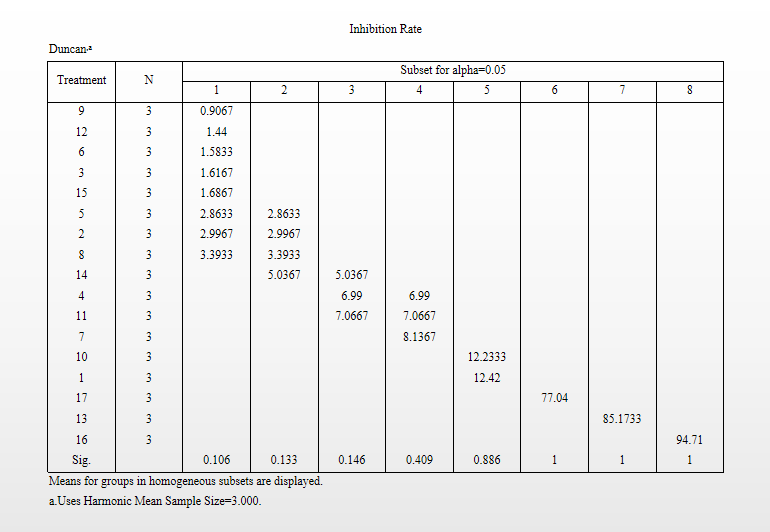


In this analysis, the 8 columns from right to left are marked with A, B, C, D, E, F, G, H, and I, then the following numbers including 16, 13, 17, 1, 10, 7, 11, 4, 14, 8, 2, 5, 15, 3, 6, 12, and 9, were labeled as A, B, C, D, D, E, EF, EF, FG, GH, GH, GH, H, H, H, H, and H, respectively. From the above analysis, there was no significant difference between treatments with the same letter; By contrast, there was a significant difference between treatments without the same letter.

1. **ANOVA and Post Hoc analysis of inhibition rates against *F. oxysporum***

4.1 One-Way ANOVA analysis:


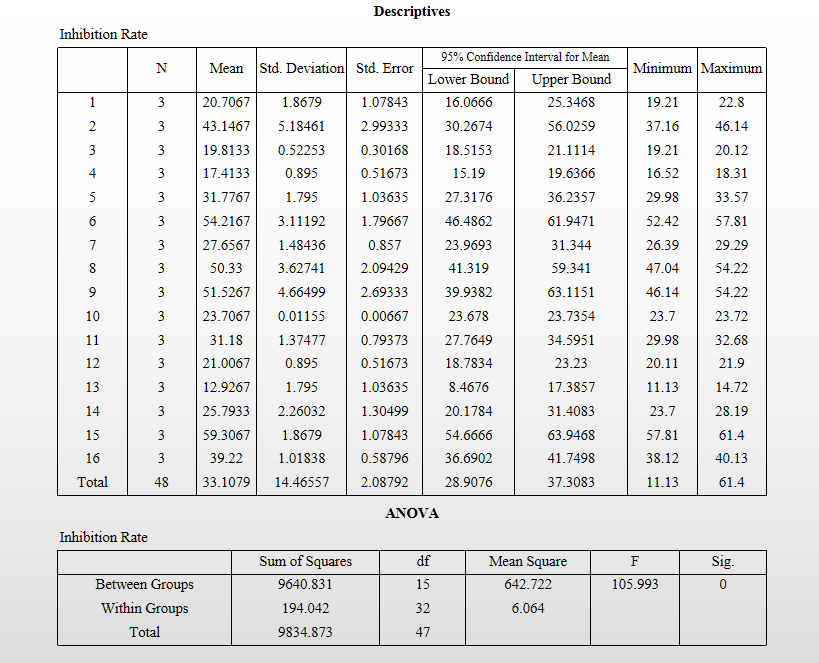


Variance analysis: each sample number (1-16) is assigned based on the compounds’ number from Table 3, “1-15” represent compounds **3a-3o**, “16” represents control drug HM. From the above analysis, a significant difference was observed among the treatment groups because Sig. is 0 ˂ 0.05.

4.2 Post Hoc Tests:


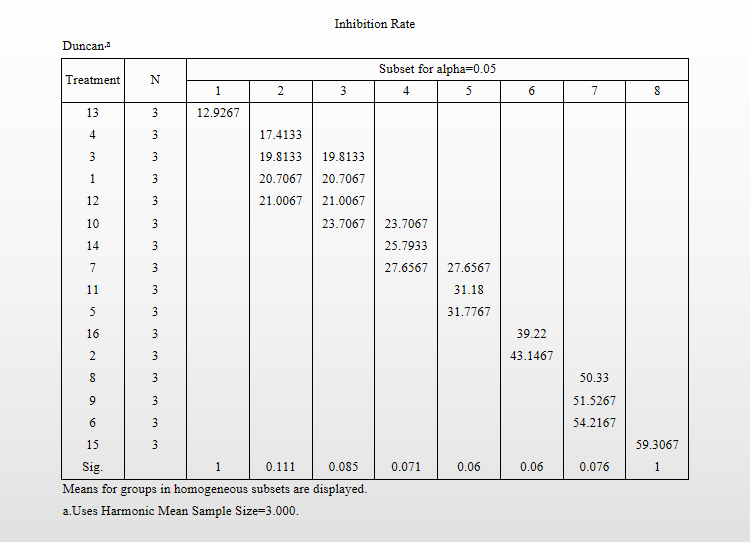


In this analysis, the 8 columns from right to left are marked with A, B, C, D, E, F, G, and H, then the following numbers including 15, 6, 9, 8, 2, 16, 5, 11, 7, 14, 10, 12, 1, 3, 4, and 13, were labeled as A, B, B, B, C, C, D, D, DE, E, EF, FG, FG, FG, F, and H, respectively. From the above analysis, there was no significant difference between treatments with the same letter; By contrast, there was a significant difference between treatments without the same letter.

**5. ANOVA and Post Hoc analysis of inhibition rates against *P. cinnamomi***

5.1 One-Way ANOVA analysis:


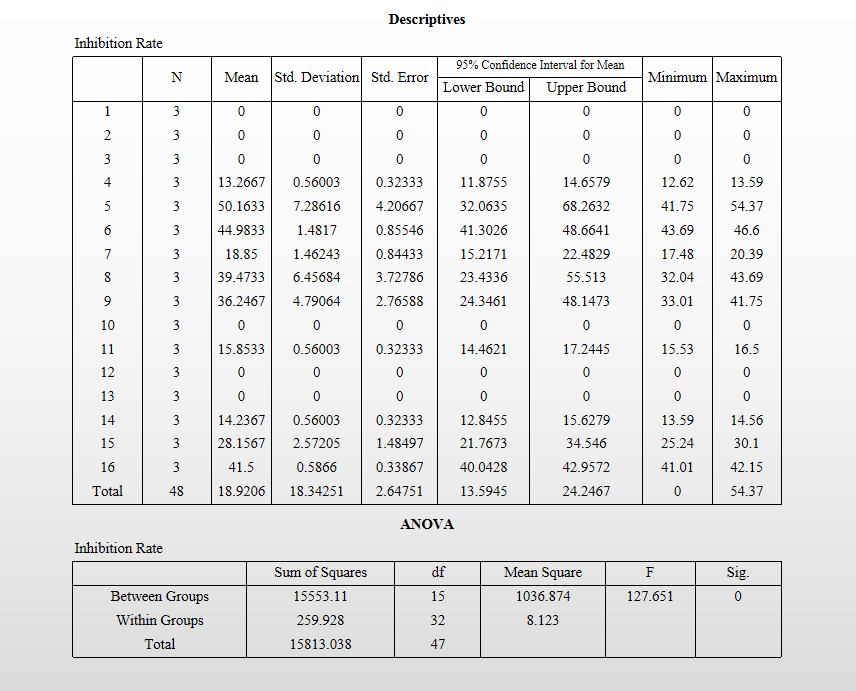


Variance analysis: each sample number (1-16) is assigned based on the compounds’ number from Table 4, “1-15” represent compounds **3a-3o**, “16” represents control drug HM. From the above analysis, a significant difference was observed among the treatment groups because Sig. is 0 ˂ 0.05.

5.2 Post Hoc Tests:


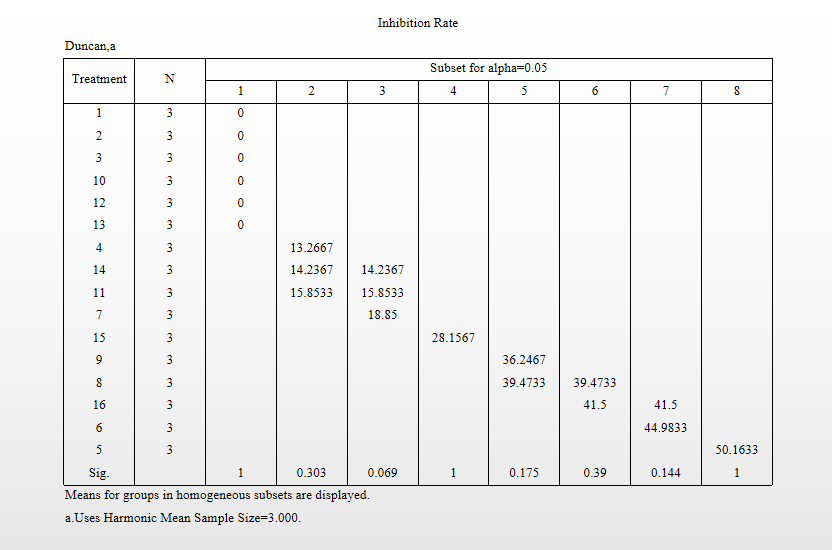


In this analysis, the 8 columns from right to left are marked with A, B, C, D, E, F, G, and H, then the following numbers including 5, 6, 16, 8, 9, 15, 7, 11, 14, 4, 13, 12, 10, 3, 2, and 1, were labeled as A, B, BC, CD, D, E, F, FG, FG, G, H, H, H, H, H, and H, respectively. From the above analysis, there was no significant difference between treatments with the same letter; By contrast, there was a significant difference between treatments without the same letter.
